# Supplementary material for: An Analysis of the Athetis lepigone Transcriptome from Four Developmental Stages
Source: PLoS One. 2013 Sep 13;8(9):e73911. doi: 10.1371/journal.pone.0073911 (PMC3772797; doi:10.1371/journal.pone.0073911)
Supplement: Table S2 — GO annotation of unigenes. (XLS) [file pone.0073911.s002.xls]

## Sheet: Sheet1
Table S2. GO annotation of unigenes.
Unigene ID	GO Number
T1_1001	GO:0005215	GO:0006810	GO:0008270	GO:0016020
T1_10014	GO:0005097	GO:0005622	GO:0032851
T1_10029	GO:0006166	GO:0016772
T1_10053	GO:0005488
T1_10068	GO:0016874
T1_10104	GO:0008152	GO:0016614
T1_10105	GO:0003735	GO:0005840	GO:0006412
T1_10109	GO:0005739	GO:0005794	GO:0006896	GO:0007291	GO:0042147
T1_10113	GO:0005316
T1_10153	GO:0000166	GO:0003676	GO:0008026
T1_10155	GO:0005488	GO:0007165	GO:0016787	GO:0044237
T1_10156	GO:0000003	GO:0005488	GO:0007275	GO:0048856
T1_10164	GO:0005488
T1_10169	GO:0016491	GO:0046914	GO:0055114
T1_1018	GO:0000175	GO:0003723	GO:0004654	GO:0006396	GO:0006402
T1_10181	GO:0004867	GO:0005509	GO:0005576	GO:0010466
T1_10195	GO:0003676	GO:0003824	GO:0006259
T1_10212	GO:0004252	GO:0005886	GO:0006508	GO:0009987
T1_10264	GO:0005887	GO:0015173	GO:0015801
T1_10278	GO:0008152	GO:0016758
T1_10283	GO:0005739	GO:0008121	GO:0022900	GO:0046872	GO:0051537	GO:0070469
T1_10287	GO:0001751	GO:0005634	GO:0005875	GO:0006457	GO:0006588	GO:0007059	GO:0007265	GO:0007294	GO:0008103	GO:0008283	GO:0008355	GO:0008426	GO:0016483	GO:0019904	GO:0042803	GO:0045172	GO:0045448	GO:0046982	GO:0050821
T1_10296	GO:0005524	GO:0006457	GO:0016491	GO:0051082
T1_10303	GO:0001516	GO:0005875	GO:0006911	GO:0007304	GO:0022008	GO:0042600
T1_10307	GO:0000287	GO:0005524	GO:0006813	GO:0008152	GO:0008556	GO:0016021
T1_10308	GO:0005488
T1_10320	GO:0000166	GO:0004674	GO:0006468	GO:0050794
T1_10331	GO:0030529
T1_10365	GO:0004842	GO:0005622	GO:0008270	GO:0016567	GO:0020037
T1_10383	GO:0003676	GO:0008270	GO:0015074
T1_10405	GO:0009522	GO:0009535	GO:0015979	GO:0016021	GO:0016168	GO:0016491	GO:0018298	GO:0022900	GO:0046872	GO:0051539
T1_10428	GO:0043170	GO:0044238
T1_10447	GO:0009987	GO:0050789
T1_10459	GO:0005488
T1_10507	GO:0006814	GO:0006885	GO:0015385	GO:0016021	GO:0048471	GO:0055085
T1_10521	GO:0016772
T1_10559	GO:0003723	GO:0003964	GO:0006278
T1_10564	GO:0005542	GO:0006810	GO:0008518	GO:0016020
T1_10573	GO:0003723	GO:0003735	GO:0006412	GO:0015935
T1_10593	GO:0003676	GO:0005524	GO:0008026
T1_10615	GO:0003735	GO:0005840	GO:0006412
T1_10616	GO:0003735	GO:0005840	GO:0006412	GO:0016787
T1_10623	GO:0006810	GO:0009987	GO:0017111	GO:0035639
T1_10624	GO:0004672
T1_10628	GO:0008270
T1_10650	GO:0006508	GO:0008237	GO:0008241	GO:0016020
T1_10679	GO:0008045	GO:0016021	GO:0035159
T1_10680	GO:0005524	GO:0005739	GO:0005852	GO:0006200	GO:0006413	GO:0008428	GO:0009055	GO:0015416	GO:0016049	GO:0016071	GO:0016491	GO:0043024	GO:0043524	GO:0051297	GO:0051536
T1_1070	GO:0002119	GO:0003735	GO:0005840	GO:0006412	GO:0009792	GO:0040010
T1_10739	GO:0005488
T1_10741	GO:0030529
T1_10757	GO:0003824	GO:0005488
T1_10783	GO:0004124	GO:0006535	GO:0016740	GO:0030170
T1_10785	GO:0005488
T1_10818	GO:0004222	GO:0006508	GO:0008270
T1_1082	GO:0003735	GO:0005840	GO:0006412
T1_10824	GO:0007165
T1_10829	GO:0000786	GO:0003677	GO:0005634	GO:0006334
T1_10852	GO:0000910	GO:0005484	GO:0005622	GO:0005886	GO:0006886	GO:0006936	GO:0007317	GO:0007349	GO:0007482	GO:0016021	GO:0016081	GO:0031629	GO:0042335
T1_10854	GO:0005622	GO:0006886	GO:0008565
T1_10875	GO:0046872
T1_10882	GO:0001752	GO:0003924	GO:0004070	GO:0004087	GO:0004088	GO:0004151	GO:0005515	GO:0005524	GO:0005525	GO:0005767	GO:0005771	GO:0005791	GO:0005811	GO:0006207	GO:0006541	GO:0006930	GO:0007155	GO:0007186	GO:0007391	GO:0007602	GO:0008020	GO:0008344	GO:0008594	GO:0009642	GO:0016021	GO:0016023	GO:0016027	GO:0016029	GO:0016476	GO:0019003	GO:0030713	GO:0030718	GO:0035099	GO:0042052	GO:0043052	GO:0044248	GO:0046328	GO:0046673	GO:0070406
T1_10883	GO:0005488	GO:0006807	GO:0016740	GO:0016787	GO:0044237	GO:0044238	GO:0044281
T1_1091	GO:0003676	GO:0044260	GO:0090304
T1_10915	GO:0003723	GO:0003964	GO:0006278
T1_10921	GO:0042626
T1_1093	GO:0002119	GO:0004602	GO:0005739	GO:0006982	GO:0007276	GO:0009792	GO:0040007	GO:0047066	GO:0055114	GO:0090087
T1_10936	GO:0005549	GO:0006810
T1_10939	GO:0005524	GO:0008553	GO:0015986	GO:0015991	GO:0045261	GO:0046933	GO:0046961
T1_10945	GO:0016740
T1_10967	GO:0006351	GO:0016568	GO:0017136	GO:0031078	GO:0032129	GO:0034739
T1_10973	GO:0004672	GO:0005216	GO:0007005	GO:0010960	GO:0016021	GO:0016049	GO:0043052	GO:0046873	GO:0055069	GO:0055085	GO:0070838
T1_11020	GO:0016787
T1_11027	GO:0042384
T1_11028	GO:0005634	GO:0006974	GO:0007411	GO:0008589	GO:0035222	GO:0043565
T1_11033	GO:0016491
T1_1105	GO:0003735	GO:0005840	GO:0006412
T1_11067	GO:0004148	GO:0005737	GO:0045454	GO:0050660	GO:0055114
T1_11074	GO:0005488
T1_11092	GO:0005488	GO:0016740
T1_11127	GO:0016787
T1_11128	GO:0016787
T1_1114	GO:0005524	GO:0008553	GO:0015986	GO:0015991	GO:0045261	GO:0046933	GO:0046961
T1_11152	GO:0003824	GO:0005488
T1_11173	GO:0016021	GO:0016246	GO:0033227	GO:0051033
T1_11197	GO:0005622
T1_1123	GO:0005840	GO:0005875
T1_11240	GO:0016853
T1_11245	GO:0005488	GO:0005634	GO:0009987	GO:0042054	GO:0043170
T1_11249	GO:0005488
T1_11256	GO:0005488
T1_11290	GO:0005488	GO:0043170	GO:0044238
T1_11307	GO:0003676	GO:0006139	GO:0016779
T1_11327	GO:0000166	GO:0004386
T1_11328	GO:0016787
T1_1133	GO:0005622
T1_11347	GO:0007423	GO:0007476	GO:0016787	GO:0030246
T1_11354	GO:0005254	GO:0006810	GO:0044464
T1_11381	GO:0004221	GO:0006511	GO:0008234	GO:0008270
T1_114	GO:0005622	GO:0034645	GO:0044238
T1_1140	GO:0003735	GO:0005840	GO:0006412
T1_11430	GO:0006810	GO:0016020	GO:0016820	GO:0016887
T1_11473	GO:0016020
T1_11483	GO:0000916	GO:0003924	GO:0005525	GO:0005635	GO:0005768	GO:0005811	GO:0005813	GO:0006897	GO:0007112	GO:0007264	GO:0007298	GO:0007317	GO:0007349	GO:0007394	GO:0008103	GO:0015031	GO:0016360	GO:0019730	GO:0022416	GO:0030140	GO:0030718	GO:0030723	GO:0031532	GO:0032154	GO:0034334	GO:0042052	GO:0042078	GO:0043195	GO:0045169	GO:0046664	GO:0048137	GO:0048210	GO:0048471	GO:0050807	GO:0060187	GO:0070732
T1_11484	GO:0005840	GO:0042254
T1_11485	GO:0000022	GO:0003735	GO:0006412	GO:0022625	GO:0042254	GO:0051298
T1_1149	GO:0003677	GO:0003682	GO:0005524	GO:0005656	GO:0006267	GO:0006270	GO:0007095	GO:0022008	GO:0043138
T1_1150	GO:0004497	GO:0009055	GO:0016705	GO:0020037	GO:0055114
T1_11520	GO:0005975	GO:0016798
T1_11546	GO:0003676
T1_11547	GO:0000166	GO:0004672
T1_11564	GO:0007165
T1_11587	GO:0003746	GO:0003924	GO:0005525	GO:0005737	GO:0006184	GO:0006414
T1_11591	GO:0003676
T1_1160	GO:0000287	GO:0003684	GO:0003887	GO:0010569	GO:0017125	GO:0019985
T1_1161	GO:0005488
T1_11616	GO:0005215
T1_11637	GO:0003723	GO:0003964	GO:0006278
T1_11658	GO:0004222	GO:0006508	GO:0008270
T1_11660	GO:0003735	GO:0006412	GO:0015934
T1_11666	GO:0034512
T1_1167	GO:0009987
T1_11672	GO:0016772
T1_11673	GO:0004672	GO:0005739	GO:0006122
T1_11674	GO:0004672	GO:0005739	GO:0006122
T1_11691	GO:0004648	GO:0006564	GO:0030170
T1_11692	GO:0016021	GO:0055085
T1_11704	GO:0004222	GO:0005524	GO:0006508	GO:0016020	GO:0017111	GO:0030163
T1_1171	GO:0003743	GO:0006413	GO:0042256	GO:0043022
T1_11737	GO:0016620
T1_11739	GO:0016021	GO:0022891	GO:0055085
T1_1174	GO:0005840
T1_11745	GO:0005975	GO:0008483
T1_11771	GO:0000122	GO:0000977	GO:0001306	GO:0003714	GO:0005634	GO:0005737	GO:0007165	GO:0007616	GO:0007620	GO:0007624	GO:0008062	GO:0008134	GO:0008340	GO:0009266	GO:0032922	GO:0043153	GO:0045187	GO:0045433	GO:0045475	GO:0045944	GO:0046982	GO:0048148	GO:2000678
T1_11773	GO:0005509	GO:0006898	GO:0007269	GO:0008021	GO:0008582	GO:0045746	GO:0048488
T1_11793	GO:0000166	GO:0008152	GO:0016874	GO:0046912
T1_11802	GO:0042626
T1_11806	GO:0000502	GO:0005524	GO:0005783	GO:0005811	GO:0005875	GO:0006200	GO:0007029	GO:0007030	GO:0007317	GO:0008103	GO:0008104	GO:0016320	GO:0016887	GO:0030433	GO:0032436	GO:0042052	GO:0045169	GO:0051301
T1_11807	GO:0001737	GO:0005525	GO:0005737	GO:0005886	GO:0007419	GO:0007507	GO:0008356	GO:0016055	GO:0019991	GO:0030866	GO:0032440	GO:0042067	GO:0042595	GO:0045886	GO:0050916	GO:0055114	GO:0060857
T1_11829	GO:0003887	GO:0005727	GO:0006270
T1_11857	GO:0004497	GO:0016705	GO:0046872
T1_11863	GO:0000166	GO:0005515	GO:0005739	GO:0005929	GO:0006754	GO:0015078	GO:0015992	GO:0033178	GO:0034220	GO:0042625
T1_11893	GO:0016020
T1_119	GO:0005488
T1_11905	GO:0009987	GO:0017111
T1_11925	GO:0003682	GO:0003729	GO:0009047	GO:0016456	GO:0035064
T1_11933	GO:0006511
T1_11964	GO:0016614
T1_11965	GO:0008152	GO:0008812
T1_11974	GO:0005009	GO:0005242	GO:0005488	GO:0005899	GO:0005911	GO:0006813	GO:0006974	GO:0006979	GO:0007285	GO:0007390	GO:0007411	GO:0007446	GO:0007623	GO:0007626	GO:0008284	GO:0008286	GO:0008340	GO:0008361	GO:0034059	GO:0040014	GO:0042220	GO:0042391	GO:0045927	GO:0046620	GO:0046777	GO:0048132	GO:0048133	GO:0060180	GO:0060250	GO:2000377
T1_11975	GO:0016491	GO:0046872
T1_1200	GO:0005622	GO:0006412
T1_12020	GO:0016740	GO:0046872
T1_12037	GO:0002161	GO:0003919	GO:0004822	GO:0005524	GO:0005737	GO:0006428	GO:0006450	GO:0009231
T1_12120	GO:0005524	GO:0006950
T1_12131	GO:0004180	GO:0005578	GO:0005886	GO:0007160	GO:0016021
T1_12132	GO:0001878	GO:0004866	GO:0005515	GO:0005615	GO:0006911	GO:0010951	GO:0043499	GO:0046331
T1_1215	GO:0016772
T1_12159	GO:0009987
T1_12163	GO:0008152	GO:0016787
T1_1217	GO:0004872	GO:0005219	GO:0005509	GO:0005789	GO:0005875	GO:0006874	GO:0006936	GO:0016021	GO:0070588
T1_12193	GO:0003824	GO:0008152	GO:0009987
T1_12209	GO:0003904	GO:0006281
T1_12234	GO:0016787
T1_12252	GO:0000122	GO:0003705	GO:0006342	GO:0007350	GO:0007400	GO:0007411	GO:0035220	GO:0043565	GO:0048749	GO:0061332
T1_12255	GO:0005110	GO:0005886	GO:0035317	GO:0060071
T1_12259	GO:0016787
T1_12278	GO:0000060	GO:0003913	GO:0005641	GO:0005737	GO:0006281	GO:0009785	GO:0009882	GO:0042752	GO:0045892	GO:0050660
T1_12308	GO:0016740
T1_12325	GO:0003735	GO:0005840	GO:0006412
T1_12333	GO:0006810	GO:0016020
T1_12365	GO:0006813	GO:0015467	GO:0016021	GO:0042391
T1_12384	GO:0009987	GO:0016301
T1_12410	GO:0000166	GO:0004832	GO:0006418
T1_12447	GO:0003735	GO:0005840	GO:0006412
T1_12459	GO:0007059	GO:0022402
T1_12503	GO:0005524	GO:0005634	GO:0005694	GO:0006281	GO:0006310	GO:0007062	GO:0030261
T1_12509	GO:0005488
T1_12545	GO:0000166	GO:0009987	GO:0016887	GO:0044238
T1_12556	GO:0006911	GO:0016021
T1_12571	GO:0005488
T1_12572	GO:0004674	GO:0005524	GO:0006468
T1_12606	GO:0016020
T1_12620	GO:0016310	GO:0016772
T1_12625	GO:0003824	GO:0005975
T1_12634	GO:0035071
T1_12640	GO:0003924	GO:0005834	GO:0007035	GO:0007186	GO:0008593
T1_12696	GO:0003887	GO:0005524	GO:0006950	GO:0008568	GO:0019538
T1_12709	GO:0005622	GO:0042981	GO:0043531
T1_12720	GO:0016772
T1_12733	GO:0016757
T1_12744	GO:0005215
T1_12751	GO:0016491
T1_12790	GO:0000166	GO:0003676	GO:0004386	GO:0042623
T1_12798	GO:0005215
T1_12817	GO:0003676	GO:0003824	GO:0006259
T1_12824	GO:0003676
T1_12827	GO:0000785	GO:0001047	GO:0001519	GO:0001700	GO:0003682	GO:0004504	GO:0005615	GO:0005730	GO:0005783	GO:0005792	GO:0006342	GO:0006697	GO:0007552	GO:0007613	GO:0008293	GO:0009055	GO:0016020	GO:0017143	GO:0018445	GO:0021954	GO:0030708	GO:0030713	GO:0035075	GO:0035102	GO:0035186	GO:0035302	GO:0043196	GO:0044060	GO:0046914	GO:0051087
T1_12846	GO:0016740
T1_12850	GO:0016787
T1_12867	GO:0005488
T1_12877	GO:0003723	GO:0003964	GO:0006278
T1_129	GO:0031427
T1_12903	GO:0016740
T1_12914	GO:0006629	GO:0016491
T1_12915	GO:0004175	GO:0005524	GO:0005737	GO:0005838	GO:0006508	GO:0008568	GO:0030163
T1_12923	GO:0005525
T1_12927	GO:0005622	GO:0008270	GO:0008705	GO:0008898	GO:0009086	GO:0031419	GO:0032259	GO:0042558
T1_12929	GO:0016311	GO:0046030	GO:0046854
T1_12945	GO:0018996	GO:0040002	GO:0040018
T1_12971	GO:0003676	GO:0004683	GO:0005524	GO:0006468	GO:0008270
T1_12975	GO:0003676	GO:0004004	GO:0005524
T1_12988	GO:0001737	GO:0004672	GO:0005886	GO:0007267	GO:0007446	GO:0007449	GO:0007474	GO:0016021	GO:0016348	GO:0017147	GO:0035159	GO:0042067	GO:0045198	GO:0060071
T1_1299	GO:0000166	GO:0005215	GO:0006810	GO:0016887
T1_13024	GO:0003723	GO:0003964	GO:0004190	GO:0006278	GO:0006508	GO:0015074
T1_13031	GO:0000137	GO:0000902	GO:0002064	GO:0005801	GO:0006911	GO:0007030	GO:0007431	GO:0009306	GO:0035149	GO:0035158
T1_13041	GO:0003824
T1_13043	GO:0009228
T1_13048	GO:0016491
T1_13066	GO:0003723	GO:0003964	GO:0006278
T1_13071	GO:0000289	GO:0003676	GO:0004535	GO:0005634	GO:0005737	GO:0006357	GO:0007095	GO:0007517	GO:0030014	GO:0048666
T1_13083	GO:0008233
T1_13087	GO:0003677	GO:0004386	GO:0005524	GO:0005634	GO:0007173	GO:0007219	GO:0008587	GO:0009790	GO:0030162	GO:0042676	GO:0045944	GO:0048477
T1_1309	GO:0003723	GO:0003735	GO:0006412	GO:0015935
T1_13098	GO:0003684	GO:0003887	GO:0019985
T1_13102	GO:0000289	GO:0000398	GO:0005737	GO:0006378	GO:0008143	GO:0022008	GO:0071011	GO:0071013
T1_1311	GO:0016787
T1_13118	GO:0005794	GO:0005975	GO:0016021	GO:0016757	GO:0030246
T1_13124	GO:0042626
T1_13127	GO:0001746	GO:0007415	GO:0016198
T1_13130	GO:0016614
T1_13137	GO:0005216	GO:0006811	GO:0016020	GO:0055085
T1_13167	GO:0001745	GO:0005615	GO:0006979	GO:0016627	GO:0032504
T1_1317	GO:0000786	GO:0003677	GO:0005634	GO:0006334
T1_13173	GO:0046331
T1_13187	GO:0005525
T1_13190	GO:0005622	GO:0019992	GO:0035556	GO:0045793	GO:0046331	GO:0046872
T1_13216	GO:0005737	GO:0008104	GO:0016021	GO:0042675	GO:0051018
T1_13219	GO:0005506	GO:0016114	GO:0020011	GO:0046429	GO:0055114
T1_13223	GO:0005488	GO:0017111
T1_13236	GO:0005576	GO:0008340	GO:0009897	GO:0030513	GO:0030718	GO:0043395
T1_13239	GO:0008233
T1_13248	GO:0004674	GO:0005524	GO:0006468
T1_13249	GO:0005488
T1_13268	GO:0016788
T1_13294	GO:0004721	GO:0004888	GO:0005622	GO:0007165	GO:0016021	GO:0045087
T1_13333	GO:0003735	GO:0005840	GO:0006412
T1_13341	GO:0005525	GO:0005739
T1_1336	GO:0008652	GO:0016740	GO:0046872	GO:0050662
T1_13361	GO:0001745	GO:0004842	GO:0005515	GO:0007480	GO:0008104	GO:0008270	GO:0008587	GO:0016567	GO:0045179	GO:0045747	GO:0045807	GO:0046331
T1_13363	GO:0000287	GO:0004450	GO:0006097	GO:0006099	GO:0051287
T1_13372	GO:0004672	GO:0005524	GO:0005778	GO:0006468	GO:0006625	GO:0007417	GO:0007422	GO:0021782	GO:0042623	GO:0048137
T1_13383	GO:0003824	GO:0043412	GO:0044238	GO:0044260	GO:0051536
T1_13390	GO:0017111
T1_13409	GO:0009987	GO:0016192	GO:0016787	GO:0019538
T1_13430	GO:0004435	GO:0004871	GO:0005509	GO:0005543	GO:0005622	GO:0006629	GO:0035556
T1_13451	GO:0006629	GO:0016787
T1_13456	GO:0003824
T1_1346	GO:0005506	GO:0009055	GO:0016614	GO:0050660	GO:0051537	GO:0055114
T1_13482	GO:0005524	GO:0008553	GO:0015986	GO:0015991	GO:0045261	GO:0046933	GO:0046961
T1_13502	GO:0003723	GO:0003964	GO:0006278
T1_13523	GO:0006779	GO:0016831
T1_13524	GO:0004739	GO:0005634	GO:0042254	GO:0055114
T1_13542	GO:0005488	GO:0043170	GO:0044238
T1_13546	GO:0005622	GO:0042981	GO:0043531
T1_13555	GO:0016491	GO:0044237
T1_13599	GO:0004497	GO:0016705	GO:0046872
T1_1362	GO:0005488
T1_13637	GO:0007605	GO:0035058	GO:0042073
T1_1364	GO:0000022	GO:0003723	GO:0003735	GO:0005811	GO:0006412	GO:0022627
T1_13641	GO:0005488
T1_13669	GO:0005488
T1_13675	GO:0033563	GO:0046872
T1_13737	GO:0003924	GO:0005525	GO:0006184
T1_13743	GO:0003824	GO:0005488
T1_13744	GO:0005488	GO:0016491
T1_1376	GO:0005515	GO:0030529
T1_13761	GO:0005488	GO:0008152	GO:0016616
T1_13762	GO:0000166	GO:0008152	GO:0016491	GO:0048037
T1_13768	GO:0004750	GO:0009052	GO:0046872
T1_13769	GO:0003824
T1_13789	GO:0000166	GO:0017111
T1_13850	GO:0005507	GO:0005524	GO:0006754	GO:0006825	GO:0016021	GO:0043682
T1_13854	GO:0005622	GO:0007552	GO:0035075
T1_13857	GO:0016297	GO:0016491
T1_13869	GO:0016298	GO:0052689
T1_13886	GO:0004430	GO:0046854	GO:0048015
T1_13932	GO:0007163	GO:0007616	GO:0008021	GO:0016021	GO:0016082	GO:0017075	GO:0022008	GO:0031594	GO:1900073
T1_1395	GO:0003723	GO:0003735	GO:0006412	GO:0015935
T1_13956	GO:0000166	GO:0004355	GO:0008152	GO:0050662
T1_13959	GO:0000922	GO:0004683	GO:0005509	GO:0005513	GO:0005516	GO:0005524	GO:0005814	GO:0005875	GO:0005886	GO:0005954	GO:0006468	GO:0007052	GO:0007099	GO:0007268	GO:0007528	GO:0007616	GO:0008049	GO:0016028	GO:0016060	GO:0016061	GO:0016062	GO:0030424	GO:0030425	GO:0030496	GO:0031476	GO:0032440	GO:0045211	GO:0046331	GO:0048786	GO:0051383	GO:0051489	GO:0051533	GO:0055114	GO:0060278	GO:0070855
T1_13987	GO:0003777	GO:0005524	GO:0006200	GO:0007018	GO:0016887	GO:0030286
T1_1399	GO:0004115	GO:0007165	GO:0007498
T1_14017	GO:0000166	GO:0006069	GO:0008270	GO:0051903
T1_14038	GO:0008879	GO:0045226	GO:0046872
T1_14044	GO:0005881	GO:0007050	GO:0015629	GO:0030713	GO:0045746
T1_14046	GO:0005622
T1_1409	GO:0005488
T1_14090	GO:0005516	GO:0005938	GO:0008105	GO:0055037	GO:0070831
T1_1411	GO:0005840
T1_14118	GO:0015824	GO:0015840	GO:0016247	GO:0048813
T1_1416	GO:0005622
T1_14188	GO:0004807	GO:0008152
T1_14196	GO:0004713	GO:0005524	GO:0006468
T1_14225	GO:0004867
T1_14249	GO:0042302
T1_1425	GO:0003735	GO:0005840	GO:0006412
T1_14283	GO:0004715	GO:0005524	GO:0006468	GO:0035071
T1_14346	GO:0000184	GO:0000932	GO:0004197	GO:0006922	GO:0007300	GO:0010603	GO:0010623	GO:0016322	GO:0030036	GO:0035071	GO:0035195	GO:0043186	GO:0045169	GO:0045451	GO:0050072	GO:1900074
T1_1436	GO:0030529
T1_14406	GO:0001745	GO:0004842	GO:0005515	GO:0007480	GO:0008104	GO:0008270	GO:0008587	GO:0016567	GO:0045179	GO:0045747	GO:0045807	GO:0046331
T1_14417	GO:0004355	GO:0005506	GO:0006537	GO:0006807	GO:0010181	GO:0016040	GO:0050660	GO:0051536	GO:0055114
T1_14457	GO:0016020
T1_14465	GO:0003725	GO:0004525	GO:0005634	GO:0007294	GO:0016075	GO:0022008	GO:0030727	GO:0031053
T1_14562	GO:0003824
T1_14589	GO:0000022	GO:0003723	GO:0003735	GO:0005811	GO:0006412	GO:0022627
T1_14593	GO:0005216
T1_14608	GO:0005524	GO:0006950	GO:0032440	GO:0055114
T1_14638	GO:0004649	GO:0005654	GO:0005975	GO:0006342	GO:0006911	GO:0009408	GO:0035065	GO:0043484	GO:0051457
T1_14645	GO:0005488
T1_14659	GO:0005515	GO:0015629	GO:0016043
T1_14673	GO:0008233
T1_1469	GO:0006810	GO:0016020	GO:0016491	GO:0022857
T1_14696	GO:0016491	GO:0046872	GO:0051536
T1_14743	GO:0003676
T1_1475	GO:0003735	GO:0005840	GO:0006412
T1_14750	GO:0007155	GO:0007423	GO:0007476	GO:0016787	GO:0030246
T1_14754	GO:0005737	GO:0006629	GO:0006911	GO:0006974	GO:0007584	GO:0008285	GO:0008340	GO:0019900	GO:0030308	GO:0042325	GO:0045792	GO:0046331	GO:0046621	GO:0046627	GO:0048477	GO:0051726	GO:0071456
T1_14790	GO:0004633	GO:0015937
T1_14865	GO:0005524	GO:0015991	GO:0033180	GO:0046034	GO:0046933	GO:0046961
T1_14866	GO:0000003	GO:0000221	GO:0002119	GO:0005524	GO:0005886	GO:0007446	GO:0008553	GO:0009792	GO:0015991	GO:0040010	GO:0040011	GO:0046034	GO:0046933	GO:0046961	GO:0048388
T1_14889	GO:0000166	GO:0004812	GO:0006418
T1_14890	GO:0000137	GO:0000902	GO:0002064	GO:0005801	GO:0006911	GO:0007030	GO:0007431	GO:0009306	GO:0035149	GO:0035158
T1_14921	GO:0004014	GO:0006597	GO:0008295	GO:0040011
T1_14946	GO:0008233
T1_14957	GO:0005488	GO:0006259
T1_14966	GO:0000015	GO:0000287	GO:0002119	GO:0004634	GO:0006096	GO:0009792	GO:0040010	GO:0040018	GO:0040035
T1_14970	GO:0005488
T1_1498	GO:0002119	GO:0003735	GO:0005840	GO:0006412	GO:0009792	GO:0018996	GO:0040018	GO:0040035
T1_14991	GO:0001676	GO:0004321	GO:0004467	GO:0045289	GO:0046949
T1_14992	GO:0003676
T1_15011	GO:0016787
T1_15014	GO:0003735	GO:0005840	GO:0006412
T1_15040	GO:0016614
T1_15045	GO:0004630	GO:0005543	GO:0007030	GO:0007349	GO:0007602	GO:0010004	GO:0031410	GO:0048215
T1_15058	GO:0005524	GO:0005737	GO:0006950	GO:0042026
T1_15082	GO:0005739
T1_15089	GO:0016020	GO:0044464
T1_15099	GO:0052689
T1_15144	GO:0000003	GO:0002119	GO:0003723	GO:0003735	GO:0005840	GO:0006412	GO:0009792	GO:0040010
T1_15174	GO:0005488	GO:0006351	GO:0044424
T1_15193	GO:0000166	GO:0006810	GO:0016020	GO:0016820	GO:0022892	GO:0043492	GO:0046872
T1_15194	GO:0000287	GO:0004012	GO:0005524	GO:0006812	GO:0008152	GO:0015662	GO:0015914	GO:0016021
T1_15216	GO:0005215	GO:0006810
T1_15225	GO:0000003	GO:0002119	GO:0003735	GO:0005840	GO:0006412	GO:0009792	GO:0018996	GO:0040007
T1_15226	GO:0003735	GO:0005840	GO:0006412
T1_1523	GO:0000166	GO:0044267
T1_15244	GO:0008045	GO:0035159
T1_15266	GO:0007521
T1_1527	GO:0006260	GO:0044424
T1_1533	GO:0008152	GO:0016874
T1_1535	GO:0008152
T1_1536	GO:0008152	GO:0016903	GO:0036094	GO:0046872	GO:0050662	GO:0051536
T1_15446	GO:0004222	GO:0006508
T1_15477	GO:0003779	GO:0004721	GO:0005509	GO:0007527	GO:0007629	GO:0010004	GO:0030239
T1_15478	GO:0016747	GO:0043229	GO:0044260	GO:0046872	GO:0090304
T1_15483	GO:0001736	GO:0004702	GO:0005515	GO:0005524	GO:0006357	GO:0007257	GO:0007298	GO:0007395	GO:0007561	GO:0008340	GO:0008545	GO:0009408	GO:0030032	GO:0030381	GO:0030424	GO:0033500	GO:0034769	GO:0035006	GO:0042060	GO:0045610	GO:0046330	GO:0046529	GO:0046843	GO:0046844	GO:0046847	GO:0048082	GO:0048675	GO:0051017	GO:0070328	GO:0071243	GO:0071276
T1_1549	GO:0003735	GO:0005840	GO:0006412
T1_15510	GO:0005488	GO:0008152	GO:0016297	GO:0016491
T1_15524	GO:0005737	GO:0030718
T1_1553	GO:0003735	GO:0006412	GO:0015935	GO:0019843
T1_15541	GO:0000166	GO:0001708	GO:0002009	GO:0005625	GO:0005737	GO:0007549	GO:0018991	GO:0040034	GO:0046872	GO:0050794	GO:0070883
T1_15555	GO:0052689
T1_15557	GO:0003924	GO:0005198	GO:0005525	GO:0005874	GO:0006184	GO:0007018	GO:0051258
T1_15579	GO:0016740
T1_1558	GO:0000287	GO:0004088	GO:0005524	GO:0006221	GO:0006526	GO:0030145
T1_15595	GO:0006396	GO:0016788
T1_1561	GO:0005975	GO:0016832	GO:0044237	GO:0046872
T1_15614	GO:0008236
T1_15617	GO:0001510	GO:0008171	GO:0035194
T1_15624	GO:0005488	GO:0016787
T1_15628	GO:0000902	GO:0001726	GO:0005515	GO:0005737	GO:0007298	GO:0007391	GO:0007417	GO:0007520	GO:0007523	GO:0030036	GO:0032863	GO:0035212	GO:0061327
T1_15638	GO:0003824
T1_15650	GO:0016787
T1_15657	GO:0003743	GO:0003924	GO:0005525	GO:0005737	GO:0006184	GO:0006413	GO:0016779
T1_1567	GO:0003824
T1_15678	GO:0004252	GO:0006508
T1_15684	GO:0002168	GO:0005739	GO:0005792	GO:0005811	GO:0008152	GO:0009055	GO:0016020	GO:0016491	GO:0035206	GO:0045610	GO:0046872	GO:0051726
T1_15701	GO:0005488
T1_1572	GO:0003824
T1_15725	GO:0005488
T1_1573	GO:0004478	GO:0005524	GO:0006556	GO:0006730	GO:0046872
T1_1574	GO:0030529
T1_15786	GO:0005488
T1_158	GO:0010467	GO:0016070
T1_15810	GO:0001158	GO:0003700	GO:0005634	GO:0007435	GO:0009953	GO:0035293	GO:0042803	GO:0045944
T1_15826	GO:0000776	GO:0000785	GO:0000796	GO:0001709	GO:0003677	GO:0003777	GO:0004566	GO:0005355	GO:0005524	GO:0005634	GO:0005739	GO:0005828	GO:0005869	GO:0006281	GO:0006310	GO:0006886	GO:0007052	GO:0007062	GO:0007076	GO:0007422	GO:0008090	GO:0015758	GO:0016021	GO:0016330	GO:0031616	GO:0034501	GO:0035011	GO:0042052	GO:0045198	GO:0045502	GO:0047497	GO:0048477	GO:0051028	GO:0051225	GO:0051299	GO:0051383	GO:0055085
T1_15833	GO:0003723	GO:0003964	GO:0006278
T1_1584	GO:0000502	GO:0004175	GO:0005524	GO:0005737	GO:0006200	GO:0006508	GO:0008568	GO:0030163
T1_15927	GO:0003987	GO:0008152	GO:0016208
T1_15934	GO:0005680	GO:0030071	GO:0031145
T1_15942	GO:0000910	GO:0005634	GO:0005875	GO:0005884	GO:0005912	GO:0006886	GO:0006911	GO:0007405	GO:0007411	GO:0007447	GO:0007455	GO:0007476	GO:0007507	GO:0008013	GO:0008017	GO:0008258	GO:0008362	GO:0016327	GO:0016337	GO:0019901	GO:0021550	GO:0030178	GO:0030424	GO:0030425	GO:0030589	GO:0030720	GO:0030866	GO:0030951	GO:0032154	GO:0035019	GO:0035190	GO:0035293	GO:0040001	GO:0043025	GO:0045179	GO:0045862	GO:0045892	GO:0046673
T1_15952	GO:0006412	GO:0016874
T1_15967	GO:0006547
T1_15973	GO:0003735	GO:0005840	GO:0006412
T1_15993	GO:0003779	GO:0017048	GO:0019031	GO:0019064	GO:0030036	GO:0035147	GO:0046789
T1_16014	GO:0003824	GO:0005488
T1_16024	GO:0051297
T1_1603	GO:0004076	GO:0009102	GO:0051536
T1_16056	GO:0004364	GO:0004602
T1_16071	GO:0035071	GO:0046331	GO:0051260
T1_16103	GO:0005488	GO:0009987	GO:0016772
T1_16113	GO:0003824	GO:0044238
T1_1612	GO:0003735	GO:0005840	GO:0006412
T1_16145	GO:0000289	GO:0004535	GO:0006508
T1_16166	GO:0005488
T1_16168	GO:0022857
T1_16179	GO:0005524	GO:0005737	GO:0006508	GO:0008233	GO:0017111	GO:0030163
T1_16183	GO:0005783	GO:0016757
T1_16186	GO:0005184	GO:0005576	GO:0007218
T1_16200	GO:0005242	GO:0006813	GO:0016021	GO:0042391
T1_16217	GO:0003924	GO:0005198	GO:0005525	GO:0005737	GO:0005874	GO:0006184	GO:0007018	GO:0051258
T1_16227	GO:0001744	GO:0005887	GO:0007298	GO:0007299	GO:0007411	GO:0008049	GO:0016325	GO:0019187	GO:0030720	GO:0033227	GO:0042248	GO:0045165	GO:0045434	GO:0046662
T1_1629	GO:0003723	GO:0003735	GO:0006412	GO:0015935
T1_16291	GO:0005516	GO:0008104	GO:0016027	GO:0016059	GO:0030159	GO:0031473
T1_16307	GO:0005488	GO:0008152	GO:0016297	GO:0016491
T1_16328	GO:0003824
T1_16330	GO:0008152
T1_16344	GO:0003333	GO:0005886	GO:0006813	GO:0006821	GO:0008511	GO:0015171	GO:0015378	GO:0016021	GO:0035826
T1_16396	GO:0003676	GO:0003700	GO:0005622	GO:0008270
T1_16414	GO:0016020	GO:0019538	GO:0035250	GO:0043231
T1_16418	GO:0004806	GO:0005811	GO:0008203	GO:0016042
T1_16429	GO:0016787
T1_1644	GO:0000166	GO:0009987	GO:0042626
T1_16442	GO:0005215	GO:0006810	GO:0044464
T1_16446	GO:0000103	GO:0004020	GO:0004781	GO:0005524	GO:0050428
T1_16466	GO:0000166	GO:0004016	GO:0005622	GO:0006171	GO:0016021	GO:0035556
T1_1648	GO:0000166	GO:0005622	GO:0007165	GO:0016740
T1_16532	GO:0005524	GO:0006950
T1_1655	GO:0003735	GO:0006412	GO:0022627	GO:0035220
T1_16553	GO:0002121	GO:0003979	GO:0007224	GO:0007367	GO:0007427	GO:0007428	GO:0007476	GO:0007507	GO:0007509	GO:0008543	GO:0015014	GO:0016055	GO:0016319	GO:0030206	GO:0042048	GO:0051287	GO:0055114
T1_16554	GO:0002121	GO:0003979	GO:0007224	GO:0007367	GO:0007427	GO:0007428	GO:0007476	GO:0007509	GO:0008543	GO:0015012	GO:0016055	GO:0016319	GO:0030206	GO:0042048
T1_16556	GO:0005506	GO:0005739	GO:0006091	GO:0016491	GO:0044425	GO:0055114
T1_16565	GO:0016787
T1_16587	GO:0002119	GO:0003924	GO:0005515	GO:0005525	GO:0005634	GO:0006184	GO:0006886	GO:0006913	GO:0007052	GO:0007264	GO:0009792	GO:0016020	GO:0040007	GO:0040011	GO:0048477
T1_16588	GO:0002119	GO:0003924	GO:0005515	GO:0005525	GO:0005634	GO:0006184	GO:0006886	GO:0006913	GO:0007052	GO:0007264	GO:0009792	GO:0016020	GO:0040007	GO:0040011	GO:0048477
T1_1659	GO:0005524	GO:0005737	GO:0005856
T1_16593	GO:0004124	GO:0006535	GO:0016740	GO:0030170
T1_16629	GO:0001700	GO:0004674	GO:0005524	GO:0005634	GO:0006468	GO:0007095	GO:0007348	GO:0007349	GO:0007444	GO:0009314	GO:0016321	GO:0030162	GO:0031151	GO:0042060	GO:0046331	GO:0051225	GO:0051299
T1_16657	GO:0000980	GO:0003700	GO:0004674	GO:0005524	GO:0005634	GO:0005783	GO:0006402	GO:0006468	GO:0007030	GO:0007552	GO:0007591	GO:0016020	GO:0016891	GO:0030968	GO:0035073	GO:0035074	GO:0043484	GO:0045944	GO:0046982	GO:0070055
T1_16677	GO:0003824
T1_16692	GO:0005975	GO:0016798
T1_16704	GO:0006546	GO:0009792
T1_16721	GO:0006403	GO:0008407	GO:0015630	GO:0016325	GO:0030715	GO:0030720	GO:0046843	GO:0051017	GO:0051663
T1_16723	GO:0052689
T1_16731	GO:0006412
T1_16766	GO:0017111
T1_16786	GO:0005488
T1_16823	GO:0031427
T1_16831	GO:0003924	GO:0005198	GO:0005525	GO:0005737	GO:0005874	GO:0006184	GO:0007018	GO:0051258
T1_16869	GO:0003824
T1_16878	GO:0004364	GO:0046872
T1_16886	GO:0006810
T1_16893	GO:0003333	GO:0005886	GO:0006813	GO:0006821	GO:0008511	GO:0015171	GO:0015378	GO:0035826
T1_16895	GO:0016757
T1_1691	GO:0004180	GO:0007275	GO:0048856
T1_16919	GO:0007638	GO:0008381	GO:0071260
T1_16922	GO:0003824
T1_16937	GO:0000022	GO:0000339	GO:0000381	GO:0002168	GO:0003724	GO:0003729	GO:0003743	GO:0005524	GO:0005634	GO:0005813	GO:0005829	GO:0005875	GO:0006268	GO:0006413	GO:0006974	GO:0007067	GO:0007446	GO:0009950	GO:0016281	GO:0017116	GO:0030718	GO:0048132	GO:0051297	GO:0072686
T1_1694	GO:0015930	GO:0016639
T1_16956	GO:0001746	GO:0005515	GO:0005737	GO:0005886	GO:0007156	GO:0007413	GO:0007614	GO:0008355	GO:0008360	GO:0008582	GO:0014069	GO:0016021	GO:0016319	GO:0030424	GO:0031594	GO:0035158	GO:0035159	GO:0036062	GO:0042059	GO:0042734	GO:0045211	GO:0048149	GO:0048803
T1_16977	GO:0003824	GO:0008152
T1_17001	GO:0003824
T1_17038	GO:0000124	GO:0000910	GO:0005703	GO:0005737	GO:0005875	GO:0006355	GO:0006911	GO:0016772	GO:0035222	GO:0045747
T1_17145	GO:0005216	GO:0006811	GO:0016021	GO:0055085
T1_17155	GO:0015574	GO:0015767	GO:0015768	GO:0015770	GO:0015771	GO:0016021	GO:0044459	GO:0055085
T1_17156	GO:0015574	GO:0015767	GO:0015768	GO:0015770	GO:0015771	GO:0044459
T1_17165	GO:0003676	GO:0003824	GO:0009987	GO:0043170	GO:0044238
T1_17179	GO:0003700	GO:0005634	GO:0006355	GO:0007365	GO:0043565
T1_17195	GO:0016787
T1_17202	GO:0004252	GO:0006508
T1_17203	GO:0004252	GO:0006508
T1_17210	GO:0005099	GO:0005622	GO:0007265	GO:0043547	GO:0051056
T1_17332	GO:0005216	GO:0006814	GO:0016020
T1_1736	GO:0003735	GO:0005840	GO:0006412
T1_17420	GO:0004672	GO:0006963	GO:0016236	GO:0034198
T1_17445	GO:0005488	GO:0044424
T1_17462	GO:0046331
T1_17466	GO:0000811	GO:0006260	GO:0022008	GO:0043138	GO:0045750	GO:0046331
T1_17479	GO:0022008
T1_17540	GO:0001700	GO:0002009	GO:0005096	GO:0007165	GO:0007424	GO:0048513	GO:0048565	GO:0048598
T1_17566	GO:0000166	GO:0004672	GO:0016310
T1_1760	GO:0003676	GO:0005524	GO:0008026
T1_17608	GO:0005524	GO:0006200	GO:0016887
T1_17609	GO:0000166	GO:0017111
T1_17620	GO:0003824	GO:0005488
T1_17636	GO:0003677	GO:0005524	GO:0005694	GO:0006260	GO:0017111
T1_17637	GO:0016491
T1_17646	GO:0002433	GO:0003924	GO:0005525	GO:0005622	GO:0006911	GO:0007254	GO:0007264	GO:0007390	GO:0007394	GO:0007426	GO:0007435	GO:0007520	GO:0008103	GO:0008104	GO:0008258	GO:0016020	GO:0030032	GO:0034334	GO:0035011	GO:0035099	GO:0042052	GO:0042742	GO:0045451	GO:0046331	GO:0050770	GO:0051017
T1_1765	GO:0008152	GO:0016798
T1_17650	GO:0004222	GO:0006508	GO:0008270
T1_17654	GO:0006412
T1_17666	GO:0005488	GO:0008152	GO:0016297	GO:0016491
T1_17667	GO:0000166	GO:0009058	GO:0016740	GO:0016788
T1_1767	GO:0003735	GO:0005840	GO:0006412
T1_1770	GO:0016798
T1_17719	GO:0005452	GO:0006820	GO:0016021
T1_17721	GO:0005524	GO:0006950
T1_17746	GO:0016772
T1_17765	GO:0004818	GO:0005524	GO:0005737	GO:0006424
T1_17767	GO:0016787
T1_17804	GO:0003700	GO:0004871	GO:0005509	GO:0005634	GO:0006355	GO:0007165
T1_17837	GO:0005543
T1_17843	GO:0004550	GO:0005524	GO:0005525	GO:0005874	GO:0005875	GO:0006165	GO:0006183	GO:0006228	GO:0006241	GO:0007017	GO:0007067	GO:0007427	GO:0008017	GO:0016334	GO:0018105	GO:0034332	GO:0035152	GO:0046777
T1_17844	GO:0004550	GO:0005524	GO:0005525	GO:0005874	GO:0005875	GO:0006165	GO:0006183	GO:0006228	GO:0006241	GO:0007017	GO:0007067	GO:0007427	GO:0008017	GO:0016334	GO:0018105	GO:0034332	GO:0035152	GO:0046777
T1_17849	GO:0003735	GO:0006412	GO:0015935
T1_17855	GO:0008236
T1_17862	GO:0005371	GO:0005740	GO:0016021	GO:0035071	GO:0055085
T1_17875	GO:0005456	GO:0005457	GO:0005458	GO:0005459	GO:0005460	GO:0005461	GO:0005462	GO:0005463	GO:0005798	GO:0015782	GO:0015784	GO:0015785	GO:0015786	GO:0015787	GO:0015788	GO:0015789	GO:0016021	GO:0036066	GO:0036071	GO:0036085	GO:0048193	GO:0048749
T1_17878	GO:0009987	GO:0016020	GO:0016787	GO:0044238
T1_17894	GO:0006099	GO:0008177	GO:0009055	GO:0051537
T1_17952	GO:0003677	GO:0007412	GO:0007417	GO:0046331
T1_17990	GO:0000175	GO:0000176	GO:0000177	GO:0005652	GO:0006397	GO:0010468	GO:0022008	GO:0071027
T1_17992	GO:0000221	GO:0005886	GO:0008553	GO:0015991	GO:0046961
T1_18035	GO:0003333	GO:0006629	GO:0015326	GO:0016020	GO:0040007
T1_18072	GO:0000166	GO:0017111
T1_18082	GO:0005215	GO:0005743	GO:0016021	GO:0055085
T1_18083	GO:0005215	GO:0005743	GO:0016021	GO:0055085
T1_18095	GO:0005488	GO:0005737	GO:0016740	GO:0034641	GO:0044238	GO:0044260
T1_18096	GO:0004497	GO:0009055	GO:0016705	GO:0020037	GO:0055114
T1_18098	GO:0004702	GO:0005524	GO:0007257	GO:0008545	GO:0030424	GO:0046330	GO:0048082	GO:0048666
T1_18120	GO:0005488
T1_18121	GO:0016491	GO:0046872	GO:0051536
T1_1813	GO:0005506	GO:0009055	GO:0016614	GO:0050660	GO:0051537	GO:0055114
T1_1815	GO:0000122	GO:0003700	GO:0005515	GO:0005634	GO:0005737	GO:0007347	GO:0007405	GO:0007517	GO:0008285	GO:0031523	GO:0035190	GO:0043035	GO:0048813
T1_18188	GO:0032501
T1_18205	GO:0005488
T1_18210	GO:0003779	GO:0005622	GO:0042063
T1_18232	GO:0005488
T1_18245	GO:0042302
T1_1825	GO:0003824	GO:0044237
T1_1830	GO:0016787
T1_18351	GO:0016491
T1_1836	GO:0003735	GO:0005840	GO:0006412
T1_18364	GO:0007095	GO:0022008
T1_1837	GO:0003723	GO:0003735	GO:0006412	GO:0015935
T1_18384	GO:0003700	GO:0004871	GO:0005509	GO:0005634	GO:0006355	GO:0007165
T1_18390	GO:0006810	GO:0016020	GO:0022857
T1_18391	GO:0000166	GO:0004825	GO:0005739	GO:0006431
T1_18397	GO:0003779	GO:0005865	GO:0006939	GO:0035626	GO:0070594
T1_1847	GO:0003735	GO:0005840	GO:0006412
T1_18470	GO:0003700	GO:0005634	GO:0006355	GO:0043565
T1_18482	GO:0003954	GO:0005747	GO:0006120
T1_18517	GO:0005622	GO:0008270
T1_1852	GO:0030529
T1_18536	GO:0016853	GO:0044267
T1_18543	GO:0005509	GO:0005887	GO:0005902	GO:0007156	GO:0007224	GO:0007305	GO:0016324	GO:0016339	GO:0016491	GO:0032533	GO:0048100
T1_18574	GO:0000287	GO:0004449	GO:0005759	GO:0005811	GO:0005875	GO:0006099	GO:0051287
T1_18578	GO:0022008	GO:0032039	GO:0034472
T1_1859	GO:0006810	GO:0050794
T1_18595	GO:0003700	GO:0005072	GO:0005515	GO:0005667	GO:0006355	GO:0007179	GO:0007346	GO:0007411	GO:0007476	GO:0016319	GO:0048813
T1_18603	GO:0005509	GO:0005783	GO:0006457	GO:0051082
T1_18610	GO:0003824
T1_18634	GO:0008152	GO:0016297	GO:0016491
T1_18658	GO:0008610	GO:0016717
T1_18659	GO:0004768	GO:0006633	GO:0006723	GO:0016020
T1_1867	GO:0000022	GO:0003735	GO:0005762	GO:0006412	GO:0022625
T1_18686	GO:0000270	GO:0005515	GO:0005576	GO:0008745	GO:0042834	GO:0050830	GO:0061060
T1_1869	GO:0000003	GO:0002119	GO:0003735	GO:0005840	GO:0006412	GO:0009792	GO:0040007
T1_18700	GO:0003924	GO:0004767	GO:0005515	GO:0005525	GO:0006887	GO:0007264	GO:0007293	GO:0007411	GO:0008103	GO:0015031	GO:0045451	GO:0045467	GO:0060078
T1_18716	GO:0000166	GO:0007165	GO:0016787
T1_18718	GO:0008233
T1_1872	GO:0030529
T1_18739	GO:0006412
T1_18742	GO:0003824	GO:0005488	GO:0044238
T1_18765	GO:0005576	GO:0019991	GO:0035152	GO:0046658
T1_18798	GO:0005886	GO:0007156	GO:0007411	GO:0008038	GO:0016338	GO:0050839
T1_18806	GO:0010467	GO:0016070	GO:0016740
T1_18821	GO:0005783	GO:0007030
T1_18831	GO:0015036
T1_18857	GO:0005515	GO:0007430	GO:0035090	GO:0044130	GO:0045571	GO:0046425	GO:0060439
T1_18871	GO:0005515	GO:0005802	GO:0005811	GO:0007269	GO:0007291	GO:0016183	GO:0030129	GO:0030132	GO:0030198	GO:0033227	GO:0035002	GO:0035159	GO:0040008	GO:0045747	GO:0045807	GO:0046667	GO:0048471
T1_18874	GO:0050830
T1_18877	GO:0003924	GO:0005525	GO:0005783	GO:0005794	GO:0006471	GO:0006892	GO:0007155	GO:0007264	GO:0007269	GO:0007276	GO:0008360	GO:0009792	GO:0010883	GO:0015031	GO:0016197	GO:0048488	GO:0048749
T1_1888	GO:0003824
T1_18896	GO:0016853
T1_18897	GO:0000166	GO:0004674	GO:0016310	GO:0019538
T1_18905	GO:0016787
T1_18926	GO:0003676	GO:0043170	GO:0044238
T1_1894	GO:0000003	GO:0009792	GO:0040010
T1_19050	GO:0005743	GO:0016021	GO:0022857	GO:0055085
T1_19053	GO:0004221	GO:0004843	GO:0005634	GO:0005700	GO:0006342	GO:0006511	GO:0016578	GO:0035328	GO:0043234
T1_19054	GO:0007163	GO:0007616	GO:0008021	GO:0016021	GO:0016082	GO:0017075	GO:0022008	GO:0031594	GO:1900073
T1_19055	GO:0009987	GO:0016829	GO:0030529
T1_19131	GO:0016491	GO:0046872
T1_19145	GO:0016740
T1_19157	GO:0006006	GO:0016620	GO:0050661	GO:0051287	GO:0055114
T1_1917	GO:0005488	GO:0009987
T1_19174	GO:0003676	GO:0017111
T1_1920	GO:0009523	GO:0009535	GO:0015979	GO:0016021	GO:0042301	GO:0050821
T1_19236	GO:0006476	GO:0008270	GO:0070403
T1_1925	GO:0008237
T1_19250	GO:0003904	GO:0006281
T1_19256	GO:0003012	GO:0030017	GO:0042595	GO:0045202
T1_19266	GO:0004312	GO:0016788
T1_19283	GO:0005488	GO:0016742	GO:0016879	GO:0034654	GO:0055086	GO:0072521
T1_1931	GO:0000166	GO:0004674	GO:0005515	GO:0007163	GO:0007411	GO:0007416	GO:0008088	GO:0018105	GO:0030424	GO:0030425	GO:0030516	GO:0034613	GO:0048489	GO:0050321
T1_19344	GO:0005622
T1_19351	GO:0005848	GO:0006379
T1_19356	GO:0004872	GO:0005509	GO:0016021
T1_19386	GO:0000022	GO:0003735	GO:0004161	GO:0004311	GO:0004337	GO:0005811	GO:0006412	GO:0008299	GO:0008354	GO:0022008	GO:0022625	GO:0035050	GO:0043025	GO:0051298
T1_19392	GO:0016787
T1_19413	GO:0016787
T1_19449	GO:0000022	GO:0003735	GO:0005811	GO:0006412	GO:0022627
T1_19452	GO:0016020
T1_19462	GO:0001541	GO:0008233	GO:0030713	GO:0040023
T1_19473	GO:0004946	GO:0004983	GO:0007218	GO:0016021	GO:0031989
T1_19509	GO:0000280	GO:0003779	GO:0005523	GO:0005634	GO:0005861	GO:0007399	GO:0007519	GO:0045214	GO:0046716	GO:0048738
T1_19512	GO:0003824
T1_19553	GO:0000166	GO:0005739	GO:0006915	GO:0007005	GO:0008860	GO:0043067	GO:0045454	GO:0050660	GO:0055114
T1_19568	GO:0002121	GO:0005086	GO:0005543	GO:0005622	GO:0007417	GO:0007476	GO:0007520	GO:0030036	GO:0032012
T1_19579	GO:0005515	GO:0009792	GO:0040010	GO:0040011
T1_19600	GO:0000910	GO:0003779	GO:0004725	GO:0005543	GO:0005912	GO:0006897	GO:0007009	GO:0008017	GO:0008091	GO:0016324	GO:0016327	GO:0030707	GO:0032432	GO:0035335	GO:0042060	GO:0045186
T1_19613	GO:0004017	GO:0016310
T1_19622	GO:0009987	GO:0016043	GO:0044464	GO:0048856	GO:0051179
T1_19644	GO:0001737	GO:0005769	GO:0008103	GO:0030100	GO:0034058	GO:0035088	GO:0045451
T1_19646	GO:0000166	GO:0003677	GO:0003887	GO:0005634	GO:0006260	GO:0008270
T1_19677	GO:0002168	GO:0005615
T1_19689	GO:0005524	GO:0008553	GO:0015986	GO:0015991	GO:0045261	GO:0046933	GO:0046961
T1_19690	GO:0005519	GO:0005768	GO:0005794	GO:0007318	GO:0031532
T1_19699	GO:0003677	GO:0004402	GO:0004672	GO:0006357	GO:0007362	GO:0007476	GO:0016573	GO:0045892
T1_19780	GO:0006071	GO:0006629	GO:0008889
T1_19942	GO:0016614
T1_19943	GO:0007498	GO:0008812
T1_19959	GO:0016829
T1_1998	GO:0003700	GO:0005634
T1_2	GO:0006810	GO:0030117
T1_20	GO:0005488
T1_20002	GO:0001104	GO:0003713	GO:0006357	GO:0007517	GO:0016592	GO:0048813
T1_20022	GO:0000022	GO:0003735	GO:0006412	GO:0022625	GO:0051298
T1_20026	GO:0004140	GO:0005524	GO:0015937	GO:0016310
T1_2005	GO:0016787
T1_20068	GO:0004427	GO:0009678	GO:0015992	GO:0016020
T1_20096	GO:0000166	GO:0006810	GO:0016020	GO:0016820	GO:0022892	GO:0043492	GO:0046872
T1_20158	GO:0044238
T1_20172	GO:0003735	GO:0005840	GO:0006412	GO:0019843
T1_2021	GO:0003735	GO:0005840	GO:0006412
T1_20228	GO:0001666	GO:0003682	GO:0003700	GO:0004362	GO:0004791	GO:0005700	GO:0005739	GO:0005875	GO:0006974	GO:0006979	GO:0007411	GO:0008023	GO:0008157	GO:0008270	GO:0008340	GO:0008354	GO:0032968	GO:0035097	GO:0042800	GO:0042803	GO:0043565	GO:0043966	GO:0044212	GO:0045454	GO:0048096	GO:0050662	GO:0051568
T1_2027	GO:0003735	GO:0005840	GO:0006412	GO:0019843
T1_20276	GO:0003779	GO:0017048	GO:0030036	GO:0035147
T1_20306	GO:0016740
T1_20318	GO:0008520	GO:0016020	GO:0055085
T1_20376	GO:0005506	GO:0009055	GO:0016614	GO:0050660	GO:0051537	GO:0055114
T1_20426	GO:0004497	GO:0004872
T1_20441	GO:0000299	GO:0000910	GO:0007602	GO:0016079	GO:0030100	GO:0045202	GO:0048488
T1_20450	GO:0006911
T1_20469	GO:0004519	GO:0005080	GO:0005509	GO:0005913	GO:0005918	GO:0007435	GO:0008104	GO:0008284	GO:0016021	GO:0016028	GO:0016044	GO:0016324	GO:0016332	GO:0016334	GO:0030507	GO:0034332	GO:0035002	GO:0035003	GO:0035090	GO:0035330	GO:0042052	GO:0042327	GO:0045186	GO:0045198	GO:0045218	GO:0045494	GO:0045746	GO:0046621	GO:0046664	GO:0048477	GO:0051539	GO:0061336
T1_2047	GO:0005840
T1_20475	GO:0004728	GO:0005001	GO:0005886	GO:0007417	GO:0007424	GO:0007616	GO:0008045	GO:0030424	GO:0035335	GO:0045177	GO:0050254
T1_20487	GO:0003723	GO:0003735	GO:0006412	GO:0015935
T1_20495	GO:0005524	GO:0006200	GO:0006810	GO:0016020	GO:0042626
T1_20496	GO:0003824
T1_20502	GO:0005622	GO:0006412
T1_20504	GO:0008233
T1_20515	GO:0004672
T1_20564	GO:0000175	GO:0003723	GO:0004654	GO:0006396	GO:0006402
T1_20565	GO:0016740
T1_20583	GO:0005215	GO:0005622	GO:0006810
T1_20585	GO:0000285	GO:0005768	GO:0008333	GO:0046854	GO:0046872
T1_20610	GO:0016491	GO:0055114
T1_20624	GO:0003735	GO:0005763	GO:0006412
T1_2063	GO:0016831	GO:0019752
T1_20655	GO:0000776	GO:0001752	GO:0003705	GO:0003777	GO:0005614	GO:0005634	GO:0005739	GO:0005828	GO:0005829	GO:0005869	GO:0005918	GO:0006886	GO:0007052	GO:0007067	GO:0007179	GO:0007314	GO:0007391	GO:0007406	GO:0008021	GO:0008090	GO:0008360	GO:0010114	GO:0016082	GO:0016323	GO:0016325	GO:0016330	GO:0016332	GO:0016334	GO:0016336	GO:0019991	GO:0030036	GO:0030863	GO:0031616	GO:0034501	GO:0035011	GO:0035072	GO:0035212	GO:0035271	GO:0035293	GO:0042052	GO:0043153	GO:0045159	GO:0045167	GO:0045175	GO:0045198	GO:0045200	GO:0045502	GO:0045746	GO:0045944
T1_20685	GO:0003743	GO:0006413	GO:0016282
T1_20687	GO:0008152	GO:0016614
T1_20695	GO:0005975	GO:0016798
T1_20696	GO:0008152	GO:0016787
T1_2072	GO:0005044	GO:0005887	GO:0006952	GO:0007155
T1_20727	GO:0003824
T1_20728	GO:0003824
T1_20775	GO:0005215	GO:0006810
T1_20792	GO:0008152	GO:0016740
T1_20793	GO:0000287	GO:0008661	GO:0009228	GO:0016114	GO:0016491	GO:0016746	GO:0016798	GO:0020011	GO:0030976
T1_20795	GO:0005488	GO:0005634	GO:0007173	GO:0007219	GO:0008587	GO:0009790	GO:0030162	GO:0042676	GO:0045944	GO:0048477
T1_208	GO:0030529
T1_2081	GO:0006810	GO:0016020	GO:0044424
T1_20847	GO:0042302
T1_2085	GO:0005488
T1_20862	GO:0005302	GO:0015105	GO:0015700	GO:0016021	GO:0055085
T1_20917	GO:0004683	GO:0004687	GO:0005875	GO:0009987
T1_20922	GO:0000976	GO:0006338	GO:0006342	GO:0007476
T1_20928	GO:0004598	GO:0005515	GO:0005912	GO:0016324	GO:0016332	GO:0040003	GO:0043025	GO:0043296	GO:0045179	GO:0045186	GO:0045196	GO:0045197	GO:0046331
T1_20930	GO:0005509	GO:0016174	GO:0042326	GO:0055114
T1_20968	GO:0003735	GO:0005840	GO:0006412	GO:0019843
T1_2099	GO:0003723	GO:0016891
T1_21007	GO:0005886
T1_2102	GO:0000166	GO:0006099	GO:0006108	GO:0030060	GO:0044262
T1_21074	GO:0016798
T1_21075	GO:0004618	GO:0005524	GO:0016310
T1_2114	GO:0005524	GO:0006200	GO:0016021	GO:0042626	GO:0055085
T1_2118	GO:0003824	GO:0006807	GO:0044237	GO:0044238
T1_21229	GO:0003676
T1_21238	GO:0003713	GO:0005634	GO:0005737	GO:0007417	GO:0007424	GO:0008327	GO:0030674	GO:0045944	GO:0048813
T1_21252	GO:0004722	GO:0006470	GO:0008287	GO:0046872
T1_2126	GO:0003676
T1_21269	GO:0008152	GO:0016746
T1_21274	GO:0005543
T1_21307	GO:0003735	GO:0006412	GO:0015934
T1_21311	GO:0007034	GO:0030904
T1_2132	GO:0004332	GO:0006096
T1_21320	GO:0008152	GO:0016798
T1_21321	GO:0004573	GO:0009311
T1_21331	GO:0004620	GO:0006629	GO:0008374
T1_21396	GO:0000166	GO:0016020	GO:0017111
T1_21474	GO:0000226	GO:0005813	GO:0005829	GO:0008088	GO:0043195	GO:0045886	GO:0048812
T1_21487	GO:0004698	GO:0005524	GO:0005622	GO:0006468	GO:0007030	GO:0008285	GO:0019992	GO:0034389	GO:0035556	GO:0045471	GO:0046872
T1_21499	GO:0003735	GO:0005763	GO:0006412
T1_2150	GO:0003735	GO:0005840	GO:0006412
T1_21511	GO:0003824	GO:0008152
T1_21519	GO:0006777	GO:0008265	GO:0016740	GO:0030151	GO:0030170
T1_21520	GO:0001077	GO:0001105	GO:0005634	GO:0005737	GO:0006727	GO:0006777	GO:0007298	GO:0007430	GO:0007475	GO:0008078	GO:0008265	GO:0008586	GO:0016740	GO:0030036	GO:0030151	GO:0030170	GO:0030431	GO:0033613	GO:0035154	GO:0045944	GO:0051302	GO:0071456
T1_21531	GO:0016787
T1_21577	GO:0005215
T1_21603	GO:0006777	GO:0008340	GO:0040010	GO:0040011	GO:0051536
T1_21616	GO:0003684	GO:0006284	GO:0006289	GO:0008534
T1_2162	GO:0003723	GO:0009536	GO:0030529
T1_21709	GO:0016922	GO:0022008	GO:0042752
T1_21734	GO:0000166	GO:0000902	GO:0005869	GO:0006911	GO:0006915	GO:0007294	GO:0008290	GO:0010591	GO:0016324	GO:0016787	GO:0019725	GO:0031122	GO:0031307	GO:0035220	GO:0047497	GO:0048489	GO:0051016	GO:0051490
T1_21735	GO:0005215	GO:0006810
T1_21795	GO:0016740
T1_21800	GO:0004662	GO:0007265	GO:0008152	GO:0022008	GO:0035050
T1_21814	GO:0000166	GO:0003824	GO:0016459
T1_21815	GO:0004553	GO:0005975	GO:0043169
T1_2182	GO:0003995	GO:0003997	GO:0005777	GO:0006635	GO:0050660
T1_21821	GO:0003676	GO:0004816	GO:0005524	GO:0005737	GO:0006421	GO:0016301	GO:0016310	GO:0016774
T1_21842	GO:0004672	GO:0004872	GO:0005524	GO:0005794	GO:0005829	GO:0006468	GO:0008361	GO:0009306	GO:0042127
T1_21848	GO:0004871	GO:0004872	GO:0007165	GO:0016020
T1_21875	GO:0004672	GO:0016787	GO:0046872
T1_21883	GO:0046872
T1_2189	GO:0003735	GO:0006412	GO:0015935
T1_21926	GO:0008519	GO:0016021	GO:0072488
T1_21927	GO:0006457	GO:0009408	GO:0031072	GO:0051082
T1_21975	GO:0005750	GO:0006122	GO:0008121
T1_22009	GO:0000791	GO:0005634	GO:0005705	GO:0007614	GO:0007616	GO:0008345	GO:0010468	GO:0018024	GO:0035076	GO:0035220	GO:0046959	GO:0050775	GO:0051567
T1_22025	GO:0003779	GO:0017048	GO:0030036
T1_22032	GO:0004252	GO:0006508
T1_22037	GO:0005576	GO:0006629	GO:0052689
T1_22046	GO:0003824
T1_22055	GO:0003735	GO:0006412	GO:0022625
T1_2208	GO:0005488
T1_22149	GO:0004683	GO:0005524	GO:0006468
T1_22199	GO:0003824	GO:0006810	GO:0009987	GO:0044238
T1_22203	GO:0007300	GO:0008092	GO:0009888	GO:0016021	GO:0030036	GO:0043232	GO:0044422	GO:0044444	GO:0051649
T1_22204	GO:0006810
T1_2221	GO:0016301
T1_22211	GO:0000122	GO:0003682	GO:0004501	GO:0004888	GO:0005515	GO:0005634	GO:0005739	GO:0005912	GO:0007015	GO:0007157	GO:0007295	GO:0007298	GO:0007314	GO:0007391	GO:0007398	GO:0007400	GO:0007403	GO:0007417	GO:0007422	GO:0007440	GO:0007446	GO:0007451	GO:0007460	GO:0007473	GO:0007474	GO:0007494	GO:0007498	GO:0007519	GO:0007521	GO:0007615	GO:0007616	GO:0008045	GO:0008258	GO:0008284	GO:0008347	GO:0008356	GO:0008407	GO:0008587	GO:0009055	GO:0009608	GO:0016021	GO:0016348	GO:0016360	GO:0020037	GO:0030708	GO:0030713	GO:0030718	GO:0030720	GO:0031410
T1_2223	GO:0000151	GO:0006511	GO:0007095	GO:0007307	GO:0051533
T1_22255	GO:0004630	GO:0007030	GO:0007349	GO:0007602	GO:0008152	GO:0010004	GO:0031410	GO:0035091	GO:0048215
T1_22264	GO:0000123	GO:0005669	GO:0006355	GO:0006367
T1_22268	GO:0003729	GO:0004004
T1_22270	GO:0003676	GO:0008026
T1_22278	GO:0016787
T1_22279	GO:0003735	GO:0005840	GO:0006412
T1_22297	GO:0004568
T1_2235	GO:0003677	GO:0005524	GO:0006260	GO:0017111
T1_2236	GO:0005506	GO:0009055	GO:0016614	GO:0050660	GO:0051537	GO:0055114
T1_22360	GO:0005519	GO:0005768	GO:0005794	GO:0007318	GO:0031532
T1_22365	GO:0005122	GO:0005576	GO:0007362	GO:0008293
T1_22387	GO:0002805	GO:0004703	GO:0004872	GO:0005524	GO:0005737	GO:0005886	GO:0006468	GO:0007296	GO:0007474	GO:0008589	GO:0008592	GO:0009790	GO:0038032	GO:0050830
T1_22429	GO:0005543	GO:0006911	GO:0006974	GO:0016303	GO:0035005	GO:0046854	GO:0046934
T1_22441	GO:0005080	GO:0005911	GO:0007435	GO:0008284	GO:0016028	GO:0016044	GO:0016324	GO:0016327	GO:0016332	GO:0016334	GO:0034332	GO:0035002	GO:0035090	GO:0035330	GO:0042052	GO:0042327	GO:0045186	GO:0045218	GO:0045494	GO:0045746	GO:0046621	GO:0046664	GO:0048477	GO:0061336
T1_22452	GO:0005509	GO:0016021	GO:0016174	GO:0055114
T1_2246	GO:0016874
T1_22461	GO:0006520	GO:0016491
T1_2251	GO:0005488	GO:0008152	GO:0016638
T1_22524	GO:0005524	GO:0006468	GO:0008353
T1_22531	GO:0003677
T1_22533	GO:0000166	GO:0006825	GO:0016020	GO:0043682	GO:0046034	GO:0046872
T1_22543	GO:0003700	GO:0005515	GO:0005634	GO:0006355	GO:0043565
T1_22544	GO:0003700	GO:0005634	GO:0006355	GO:0043565
T1_22549	GO:0009987	GO:0032501	GO:0048856
T1_2255	GO:0000003	GO:0002119	GO:0003735	GO:0006412	GO:0008340	GO:0009792	GO:0010171	GO:0015935	GO:0019843	GO:0040010
T1_22560	GO:0005215
T1_22561	GO:0005215
T1_22593	GO:0016199	GO:0030424	GO:0043025	GO:0046329	GO:0046664	GO:0052866	GO:0071683
T1_22631	GO:0001077	GO:0005634	GO:0006355	GO:0007067	GO:0007584	GO:0007623	GO:0040007	GO:0042023	GO:0042803	GO:0043565
T1_22667	GO:0000166	GO:0003676	GO:0044237	GO:0044238
T1_22675	GO:0016740
T1_227	GO:0003676	GO:0006259	GO:0016779
T1_22700	GO:0005784	GO:0006613	GO:0030176
T1_22725	GO:0000978	GO:0000980	GO:0001078	GO:0001964	GO:0002121	GO:0003682	GO:0005700	GO:0007426	GO:0007476	GO:0016476	GO:0017053	GO:0031987	GO:0035001	GO:0035147	GO:0035151	GO:0040003	GO:0042675	GO:0042803	GO:0045467	GO:0045892	GO:0045944	GO:0046843	GO:0048053	GO:0048750	GO:0048813	GO:0048854
T1_22726	GO:0016491
T1_22729	GO:0005576	GO:0006030	GO:0008061	GO:0016490
T1_22738	GO:0005219	GO:0005509	GO:0005789	GO:0005875	GO:0006874	GO:0006936	GO:0016021	GO:0070588
T1_22744	GO:0052689
T1_22749	GO:0003676
T1_22750	GO:0003676	GO:0043170	GO:0044238
T1_22777	GO:0003779	GO:0005856	GO:0006911	GO:0008360	GO:0030031	GO:0030041	GO:0030866	GO:0042060
T1_22794	GO:0003824
T1_22800	GO:0007067	GO:0007113	GO:0016301	GO:0016310	GO:0016538	GO:0019005
T1_22805	GO:0004497	GO:0009055	GO:0016705	GO:0020037	GO:0055114
T1_22815	GO:0004300	GO:0005875	GO:0017091
T1_2282	GO:0005488	GO:0005975	GO:0016857	GO:0044237
T1_22822	GO:0005198
T1_22856	GO:0003700	GO:0004871	GO:0005509	GO:0005634	GO:0006355	GO:0007165
T1_2288	GO:0005488	GO:0008152	GO:0016887
T1_22908	GO:0000398	GO:0071011	GO:0071013
T1_2293	GO:0003824
T1_22951	GO:0000003	GO:0002119	GO:0040010
T1_22953	GO:0044428
T1_22955	GO:0003824
T1_23040	GO:0005784	GO:0006616	GO:0010507	GO:0015450	GO:0022008	GO:0030176
T1_23046	GO:0003735	GO:0005840	GO:0006412
T1_23055	GO:0005737	GO:0008104	GO:0016021	GO:0042675	GO:0051018
T1_23059	GO:0050830
T1_23078	GO:0007638	GO:0008381	GO:0071260
T1_23092	GO:0003677	GO:0006355	GO:0006397	GO:0007476	GO:0008360	GO:0008380	GO:0008582	GO:0021551	GO:0030036	GO:0042048	GO:0045177	GO:0071011	GO:0071013
T1_23094	GO:0005840
T1_2312	GO:0006810	GO:0008146
T1_23120	GO:0015114
T1_23124	GO:0005524	GO:0006886	GO:0016192	GO:0016301	GO:0016310	GO:0016773	GO:0030117
T1_2313	GO:0003677	GO:0003887	GO:0005524	GO:0005663	GO:0005875	GO:0006260	GO:0017111	GO:0031122	GO:0046331
T1_23180	GO:0008012
T1_23191	GO:0000122	GO:0000980	GO:0001706	GO:0001709	GO:0002121	GO:0003700	GO:0005634	GO:0006911	GO:0007384	GO:0007385	GO:0007424	GO:0007476	GO:0007482	GO:0007494	GO:0007501	GO:0008270	GO:0010092	GO:0019904	GO:0035052	GO:0036011	GO:0042220	GO:0042694	GO:0045475	GO:0045570	GO:0048636	GO:0060969	GO:0061327
T1_23207	GO:0000900	GO:0003700	GO:0005634	GO:0006355	GO:0007282	GO:0007284	GO:0007423	GO:0030718	GO:0030727	GO:0045165	GO:0045169	GO:0045170	GO:0045478	GO:0048132	GO:0048814
T1_23230	GO:0003712	GO:0005634	GO:0006355	GO:0006366
T1_23243	GO:0008236
T1_23287	GO:0007154	GO:0031667	GO:0045892	GO:0051716
T1_23295	GO:0005215	GO:0006810
T1_23298	GO:0016787
T1_23306	GO:0004016
T1_2333	GO:0002161	GO:0004822	GO:0005524	GO:0005737	GO:0006428	GO:0006450
T1_23343	GO:0003824	GO:0005488
T1_23344	GO:0005488
T1_23354	GO:0005488
T1_23373	GO:0000166	GO:0003676	GO:0008270
T1_23431	GO:0001700	GO:0005524	GO:0006200	GO:0006726	GO:0006810	GO:0006917	GO:0006950	GO:0007610	GO:0009416	GO:0009887	GO:0010623	GO:0016021	GO:0016887	GO:0019222	GO:0019538	GO:0035071	GO:0044249	GO:0044464	GO:0048609
T1_23437	GO:0022008
T1_23447	GO:0005262	GO:0006816	GO:0009270	GO:0009987	GO:0016020
T1_23464	GO:0004721	GO:0006470	GO:0016740
T1_23480	GO:0048609
T1_23483	GO:0006810	GO:0015301	GO:0016020
T1_23484	GO:0003824
T1_23515	GO:0005737	GO:0006911	GO:0017183
T1_23519	GO:0016021
T1_23522	GO:0016787
T1_23538	GO:0006508	GO:0016787
T1_23542	GO:0003735	GO:0006364	GO:0006417	GO:0022627	GO:0042127	GO:0043022	GO:0048542
T1_2355	GO:0003824	GO:0008152
T1_23569	GO:0016021
T1_23590	GO:0000189	GO:0000790	GO:0005524	GO:0005643	GO:0005700	GO:0005938	GO:0007173	GO:0007474	GO:0008283	GO:0008320	GO:0008536	GO:0008586	GO:0016318	GO:0016321	GO:0016456	GO:0016572	GO:0031936	GO:0035175	GO:0035311	GO:0042052	GO:0042675	GO:0043524	GO:0045465	GO:0046331	GO:0048471	GO:0048477
T1_23600	GO:0000022	GO:0003735	GO:0005811	GO:0006412	GO:0022627
T1_2361	GO:0005506	GO:0009055	GO:0016614	GO:0050660	GO:0051537	GO:0055114
T1_23619	GO:0016787
T1_23631	GO:0042302
T1_23667	GO:0003824
T1_2372	GO:0000166	GO:0050662
T1_23721	GO:0017168
T1_2373	GO:0000166	GO:0004672	GO:0016310
T1_23740	GO:0016702
T1_23747	GO:0004497	GO:0005783	GO:0005792	GO:0006697	GO:0007391	GO:0007417	GO:0007494	GO:0008258	GO:0009055	GO:0016020	GO:0016705	GO:0020037	GO:0042335	GO:0048477	GO:0048566	GO:0055114
T1_23783	GO:0022008
T1_23789	GO:0000786	GO:0003677	GO:0005634	GO:0006334
T1_23802	GO:0000022	GO:0000339	GO:0000381	GO:0002168	GO:0003724	GO:0003729	GO:0003743	GO:0005524	GO:0005634	GO:0005813	GO:0005829	GO:0005875	GO:0006268	GO:0006413	GO:0006974	GO:0007067	GO:0007446	GO:0009950	GO:0016281	GO:0017116	GO:0030718	GO:0048132	GO:0051297	GO:0072686
T1_23811	GO:0003824	GO:0044237	GO:0044238
T1_2383	GO:0004683	GO:0005524	GO:0006468	GO:0042594
T1_2385	GO:0005515	GO:0005783	GO:0007418	GO:0045926
T1_23856	GO:0005326	GO:0005615	GO:0006836	GO:0007217	GO:0007610
T1_2387	GO:0003735	GO:0005840	GO:0006412
T1_23879	GO:0005875
T1_23904	GO:0004362	GO:0005737	GO:0006749	GO:0045454	GO:0050660	GO:0050661	GO:0055114
T1_23945	GO:0003676	GO:0008026
T1_23948	GO:0030529
T1_23963	GO:0008270
T1_23964	GO:0009792
T1_23969	GO:0002119	GO:0004842	GO:0005524	GO:0005875	GO:0007067	GO:0007140	GO:0007286	GO:0008054	GO:0008340	GO:0008406	GO:0009792	GO:0016322	GO:0016477	GO:0030718	GO:0031625	GO:0031647	GO:0040007	GO:0040035	GO:0042787	GO:0045676	GO:0048132	GO:0051276
T1_23980	GO:0001745	GO:0001764	GO:0003779	GO:0006911	GO:0007030	GO:0007413	GO:0007520	GO:0008335	GO:0008360	GO:0030031	GO:0030037	GO:0030866	GO:0031209	GO:0034314	GO:0048846	GO:0051125	GO:0060305
T1_23985	GO:0006963	GO:0016236	GO:0016772	GO:0034198
T1_23986	GO:0004672	GO:0006963	GO:0016236	GO:0034198
T1_23999	GO:0003824
T1_24004	GO:0016787
T1_24022	GO:0003677	GO:0005524	GO:0005634	GO:0006270	GO:0017111
T1_2403	GO:0003676	GO:0003777	GO:0005524	GO:0005858	GO:0006200	GO:0007018	GO:0042623
T1_24052	GO:0005875
T1_24053	GO:0016787
T1_24054	GO:0000212	GO:0000915	GO:0007110	GO:0007111	GO:0007112	GO:0051225
T1_24063	GO:0003824
T1_24068	GO:0016740
T1_24088	GO:0003677	GO:0005524	GO:0005634	GO:0006355	GO:0008026
T1_24095	GO:0004222	GO:0005759	GO:0006508	GO:0008270
T1_24106	GO:0000166	GO:0003735	GO:0005840	GO:0006412
T1_24119	GO:0004418	GO:0018160	GO:0033014
T1_24145	GO:0005811	GO:0016787
T1_24158	GO:0003735	GO:0006412	GO:0015935
T1_24171	GO:0003677	GO:0005847	GO:0006378	GO:0006379	GO:0006398	GO:0016787	GO:0022008
T1_24176	GO:0004364	GO:0005741	GO:0005792	GO:0005811
T1_24198	GO:0016491
T1_24199	GO:0016614
T1_24208	GO:0000287	GO:0004450	GO:0006099	GO:0006102	GO:0051287
T1_24219	GO:0016491
T1_24237	GO:0005622	GO:0006810	GO:0008104	GO:0048731	GO:0050789	GO:0051649	GO:0065008	GO:0071842
T1_24289	GO:0003824	GO:0005488
T1_24295	GO:0003676	GO:0016818
T1_24312	GO:0008236
T1_24324	GO:0005198
T1_24327	GO:0003824
T1_24331	GO:0016787
T1_2434	GO:0004553	GO:0008152
T1_24367	GO:0016020
T1_24375	GO:0005777	GO:0008609	GO:0008611	GO:0016614
T1_24377	GO:0005524	GO:0005737	GO:0005856
T1_2438	GO:0000022	GO:0003735	GO:0005811	GO:0006412	GO:0022627
T1_24386	GO:0005576	GO:0007155	GO:0007415	GO:0016198
T1_24391	GO:0004797	GO:0005524	GO:0005739	GO:0006165	GO:0006230	GO:0016773
T1_24394	GO:0003985	GO:0005739	GO:0005811	GO:0005875	GO:0006090	GO:0006633	GO:0007052
T1_24429	GO:0000398	GO:0005681	GO:0030532	GO:0033962
T1_24450	GO:0005515
T1_24460	GO:0005681
T1_2448	GO:0004872
T1_24491	GO:0005488
T1_2453	GO:0016021	GO:0022857	GO:0055085
T1_24543	GO:0003824
T1_24544	GO:0005811	GO:0016853
T1_24553	GO:0000138	GO:0016021
T1_2457	GO:0017111
T1_24573	GO:0000781	GO:0007067	GO:0016070	GO:0016233
T1_24617	GO:0005811	GO:0022416	GO:0035220
T1_24628	GO:0005975	GO:0006629	GO:0009269	GO:0010891
T1_2463	GO:0003824
T1_24637	GO:0001174	GO:0003743	GO:0005667	GO:0006357	GO:0006413	GO:0008134	GO:0008270	GO:0051101
T1_24638	GO:0001174	GO:0003743	GO:0005667	GO:0006357	GO:0006413	GO:0008134	GO:0008270	GO:0051101
T1_24661	GO:0008081	GO:0008152	GO:0017168	GO:0046872
T1_2467	GO:0005840
T1_24682	GO:0005085
T1_24697	GO:0003746	GO:0003924	GO:0005525	GO:0006184	GO:0006414
T1_24710	GO:0000166	GO:0003857	GO:0004303	GO:0005739	GO:0005811	GO:0005829	GO:0005875	GO:0006631	GO:0006637	GO:0008205	GO:0008209	GO:0008210	GO:0018454	GO:0047022	GO:0047035	GO:0050327	GO:0055114
T1_24748	GO:0000276	GO:0005811	GO:0005875	GO:0008553	GO:0015986
T1_2477	GO:0004748	GO:0005971	GO:0006260	GO:0006919	GO:0009186	GO:0022008	GO:0046914	GO:0055114
T1_24783	GO:0004221	GO:0006511
T1_2479	GO:0005509	GO:0007229
T1_24791	GO:0003689	GO:0005524	GO:0005634	GO:0005663	GO:0005875	GO:0006260	GO:0022008	GO:0046331
T1_24814	GO:0003824
T1_2484	GO:0009535	GO:0009767	GO:0016021	GO:0016491	GO:0022904	GO:0045156
T1_24842	GO:0000022	GO:0003735	GO:0006412	GO:0019843	GO:0022627
T1_24869	GO:0003924	GO:0004871	GO:0005834	GO:0007015	GO:0007155	GO:0007186	GO:0007637	GO:0008360	GO:0035050	GO:0045176	GO:0055059
T1_24872	GO:0000151	GO:0004842	GO:0016567
T1_24873	GO:0004842	GO:0008270	GO:0016567	GO:0030163
T1_24882	GO:0008643	GO:0016020	GO:0022891
T1_24893	GO:0005506	GO:0005737	GO:0019310	GO:0050113	GO:0055114
T1_249	GO:0003735	GO:0005840	GO:0006412
T1_24923	GO:0003676	GO:0043170	GO:0044238
T1_24943	GO:0004842	GO:0016567
T1_2495	GO:0003723	GO:0003735	GO:0005811	GO:0006412	GO:0022627
T1_24978	GO:0000166	GO:0006810	GO:0008559	GO:0009987
T1_24983	GO:0004133
T1_2501	GO:0008610	GO:0016491
T1_25022	GO:0004402	GO:0005634	GO:0006355	GO:0016573
T1_25028	GO:0016787
T1_2503	GO:0008152	GO:0016491
T1_2504	GO:0016829
T1_25043	GO:0004359	GO:0005739	GO:0006541	GO:0007476
T1_25072	GO:0003774	GO:0005524	GO:0016459
T1_25101	GO:0007602	GO:0016021	GO:0016063	GO:0016116	GO:0035071	GO:0043052
T1_25107	GO:0000010
T1_25133	GO:0003723	GO:0003735	GO:0005762	GO:0005763	GO:0006412
T1_25134	GO:0009987
T1_25155	GO:0005488
T1_25174	GO:0004180	GO:0046872
T1_2519	GO:0003735	GO:0005811	GO:0006412	GO:0022625	GO:0051298
T1_25199	GO:0005975	GO:0016798	GO:0043169
T1_25209	GO:0016021
T1_25213	GO:0005215	GO:0006810	GO:0008289
T1_2524	GO:0000398	GO:0003723	GO:0005681
T1_25242	GO:0004129	GO:0005751	GO:0005811	GO:0006123
T1_25243	GO:0000287	GO:0004449	GO:0004450	GO:0005739	GO:0005811	GO:0005875	GO:0006097	GO:0006099	GO:0006102	GO:0051287
T1_25252	GO:0009987
T1_25257	GO:0003735	GO:0005840	GO:0006412
T1_25272	GO:0005576	GO:0006629	GO:0016787
T1_25273	GO:0004356	GO:0005524	GO:0005737	GO:0006538	GO:0006542	GO:0006807	GO:0007416	GO:0045213
T1_25274	GO:0005488
T1_2529	GO:0000022	GO:0003723	GO:0003735	GO:0005811	GO:0006412	GO:0022627	GO:0051298
T1_25290	GO:0003824	GO:0005488
T1_25291	GO:0003824	GO:0005488
T1_25312	GO:0031224	GO:0050896
T1_2532	GO:0000166	GO:0004672	GO:0016310
T1_25323	GO:0005488	GO:0009987	GO:0016787
T1_25329	GO:0004888	GO:0006967	GO:0007165	GO:0016021
T1_25340	GO:0008236
T1_25341	GO:0008236
T1_25353	GO:0004252	GO:0006508
T1_25354	GO:0003824
T1_2537	GO:0006412	GO:0016874
T1_25401	GO:0016772
T1_25417	GO:0005515	GO:0005634	GO:0005737	GO:0022008	GO:0035048	GO:0048024
T1_25424	GO:0005216	GO:0006811	GO:0009270	GO:0016021	GO:0055085
T1_2546	GO:0003676
T1_25460	GO:0016787
T1_25461	GO:0003924	GO:0005200	GO:0005525	GO:0005737	GO:0005874	GO:0006184	GO:0007018	GO:0007411	GO:0007507	GO:0009416	GO:0030537	GO:0045298	GO:0051258
T1_25464	GO:0016773
T1_25476	GO:0006810	GO:0008142
T1_25478	GO:0005515	GO:0005634	GO:0005737	GO:0006342	GO:0016575	GO:0032041	GO:0043066	GO:0046969	GO:0046970
T1_2550	GO:0003824
T1_25503	GO:0005509
T1_25531	GO:0003746	GO:0003924	GO:0005525	GO:0006184	GO:0006414	GO:0009570	GO:0016779
T1_25545	GO:0046427
T1_25576	GO:0016491	GO:0046872
T1_25579	GO:0016881
T1_25590	GO:0003677	GO:0004842	GO:0005622	GO:0006355	GO:0006916	GO:0007291
T1_25594	GO:0016491	GO:0020011	GO:0051536	GO:0055114
T1_25605	GO:0000139	GO:0005783	GO:0005795	GO:0006886	GO:0006904	GO:0007030	GO:0008565	GO:0048280
T1_25644	GO:0005737	GO:0006508	GO:0008239	GO:0016805
T1_25659	GO:0003723	GO:0005730
T1_25666	GO:0016787
T1_25684	GO:0005783	GO:0007030	GO:0009306	GO:0022008
T1_25691	GO:0003676	GO:0005783	GO:0007030	GO:0009306	GO:0016021
T1_257	GO:0005576	GO:0042742
T1_25720	GO:0004702	GO:0004703	GO:0005025	GO:0005524	GO:0007179	GO:0007346	GO:0007405	GO:0007411	GO:0007455	GO:0007476	GO:0009411	GO:0010862	GO:0016319	GO:0016361	GO:0023014	GO:0030513	GO:0032924	GO:0040018	GO:0048179	GO:0048185	GO:0048813
T1_25725	GO:0016021	GO:0030001	GO:0046873	GO:0055085
T1_25747	GO:0004089	GO:0005576	GO:0008270
T1_2576	GO:0005488	GO:0006811	GO:0016820
T1_25762	GO:0006996
T1_25763	GO:0000151	GO:0006511	GO:0016567	GO:0034450
T1_25764	GO:0000151	GO:0006511	GO:0016567	GO:0034450
T1_25775	GO:0005576	GO:0006030	GO:0008061	GO:0016810	GO:0022008
T1_25789	GO:0003677	GO:0003899	GO:0005665	GO:0006366	GO:0008270
T1_25802	GO:0008233
T1_25804	GO:0003824
T1_25814	GO:0004496	GO:0005524	GO:0005737	GO:0008299	GO:0016310
T1_25859	GO:0002121	GO:0005790	GO:0005811	GO:0042048	GO:0044432	GO:0045169
T1_25876	GO:0007031
T1_25896	GO:0046872
T1_25909	GO:0004364	GO:0006979	GO:0009408
T1_25910	GO:0016740
T1_25912	GO:0006911	GO:0008088	GO:0019894	GO:0022008
T1_25952	GO:0000166	GO:0003676	GO:0004386
T1_2596	GO:0000022	GO:0003735	GO:0006412	GO:0022625	GO:0051298
T1_25960	GO:0001709	GO:0001751	GO:0003700	GO:0005634	GO:0005737	GO:0006355	GO:0007297	GO:0007422	GO:0007476	GO:0008101	GO:0008284	GO:0009996	GO:0030307	GO:0035071	GO:0035282	GO:0042803	GO:0043066	GO:0045746	GO:0046843
T1_2598	GO:0016021	GO:0055085
T1_25980	GO:0042302
T1_25990	GO:0005737	GO:0019991	GO:0035151
T1_25991	GO:0004756	GO:0005524	GO:0006541	GO:0007005	GO:0007444	GO:0008284	GO:0016260	GO:0016310	GO:0022008	GO:2000378
T1_26007	GO:0004674	GO:0005524	GO:0006468	GO:0051301
T1_26018	GO:0000166	GO:0004488	GO:0009396	GO:0055114
T1_26031	GO:0016491	GO:0046872
T1_26032	GO:0016491
T1_26033	GO:0016491	GO:0046872
T1_26045	GO:0000381	GO:0003676	GO:0004004	GO:0005524	GO:0005682	GO:0007067	GO:0071011	GO:0071013
T1_26059	GO:0005792	GO:0006694	GO:0007304	GO:0007480	GO:0008395	GO:0009055	GO:0016020	GO:0016705	GO:0020037	GO:0035074	GO:0035210	GO:0046344	GO:0055114
T1_26060	GO:0004181	GO:0006508	GO:0008270
T1_26097	GO:0003924	GO:0005198	GO:0005525	GO:0005737	GO:0005874	GO:0006184	GO:0007018	GO:0051258
T1_26103	GO:0005840
T1_26114	GO:0004032	GO:0055114
T1_26147	GO:0003824	GO:0008152
T1_2615	GO:0007165	GO:0016772	GO:0044237
T1_26156	GO:0030414
T1_26164	GO:0042802
T1_26170	GO:0016791
T1_26205	GO:0003676	GO:0009987	GO:0032991	GO:0044446
T1_26210	GO:0000166	GO:0016620	GO:0055114
T1_26217	GO:0000398	GO:0003723	GO:0007052	GO:0007281	GO:0008406	GO:0015030	GO:0030532	GO:0045495	GO:0071011	GO:0071013
T1_26242	GO:0000166	GO:0003899	GO:0004872	GO:0006351
T1_26298	GO:0008236
T1_26301	GO:0003677	GO:0003899	GO:0005665	GO:0006366	GO:0007095
T1_26317	GO:0016772
T1_26380	GO:0005488	GO:0005622
T1_26382	GO:0003730	GO:0008283	GO:0008593	GO:0042981
T1_2639	GO:0000398	GO:0005080	GO:0005737	GO:0005875	GO:0007626	GO:0018991	GO:0035220	GO:0042335	GO:0048477	GO:0071011	GO:0071013
T1_26405	GO:0000022	GO:0005813	GO:0005819	GO:0007026	GO:0030496	GO:0051011	GO:0051013
T1_26410	GO:0008081	GO:0009987	GO:0044238
T1_26411	GO:0006071	GO:0006629	GO:0008889
T1_26430	GO:0004497	GO:0005488	GO:0008152
T1_2645	GO:0003723	GO:0003735	GO:0005763	GO:0006412	GO:0022627
T1_26457	GO:0005488
T1_26477	GO:0000166	GO:0003723	GO:0004386	GO:0006413
T1_26491	GO:0006520	GO:0016491
T1_26492	GO:0016020	GO:0016740
T1_26505	GO:0008152	GO:0016787
T1_26522	GO:0016042	GO:0016788
T1_26551	GO:0009062	GO:0016874	GO:0019433	GO:0046627	GO:0071616
T1_26557	GO:0003824	GO:0005886	GO:0006901	GO:0008104	GO:0022008	GO:0030136	GO:0045807	GO:0048489
T1_26563	GO:0008152
T1_26565	GO:0004687	GO:0005200	GO:0005524	GO:0006468	GO:0007498	GO:0008307	GO:0008586	GO:0030018	GO:0045214
T1_26586	GO:0004809	GO:0006400
T1_26598	GO:0005488
T1_26604	GO:0003676
T1_26615	GO:0016853
T1_26650	GO:0005488
T1_26666	GO:0046872
T1_26690	GO:0005509
T1_26691	GO:0042302
T1_2671	GO:0000022	GO:0003735	GO:0006412	GO:0022625	GO:0051298
T1_26712	GO:0005524	GO:0016881	GO:0019781	GO:0043234	GO:0045116	GO:0045879
T1_26715	GO:0004222	GO:0017090	GO:0046872
T1_26729	GO:0005811	GO:0016758
T1_26739	GO:0000381	GO:0001558	GO:0003729	GO:0005515	GO:0006376	GO:0007282	GO:0008266	GO:0022008	GO:0043234	GO:0051726	GO:0071011	GO:0071013
T1_26751	GO:0005516	GO:0007291	GO:0042066	GO:0046872
T1_26779	GO:0015031
T1_26780	GO:0004252	GO:0006508
T1_26781	GO:0008236
T1_26811	GO:0000278	GO:0000976	GO:0000981	GO:0001708	GO:0001751	GO:0005102	GO:0005886	GO:0006357	GO:0006952	GO:0006955	GO:0007166	GO:0007369	GO:0007422	GO:0007450	GO:0007469	GO:0007480	GO:0007498	GO:0008358	GO:0008587	GO:0010629	GO:0016043	GO:0016477	GO:0030054	GO:0030707	GO:0031410	GO:0035215	GO:0042067	GO:0042127	GO:0043231	GO:0044425	GO:0045596	GO:0045893	GO:0048646	GO:0048863	GO:2000026
T1_26812	GO:0000278	GO:0000976	GO:0000981	GO:0001708	GO:0001751	GO:0005102	GO:0005886	GO:0006357	GO:0006952	GO:0006955	GO:0007166	GO:0007369	GO:0007422	GO:0007450	GO:0007469	GO:0007480	GO:0007498	GO:0008358	GO:0008587	GO:0010629	GO:0016043	GO:0016477	GO:0030054	GO:0030707	GO:0031410	GO:0035215	GO:0042067	GO:0042127	GO:0043231	GO:0044425	GO:0045596	GO:0045893	GO:0048646	GO:0048863	GO:2000026
T1_26852	GO:0016787
T1_26853	GO:0016791
T1_26857	GO:0006139	GO:0016810	GO:0047710
T1_26863	GO:0008270
T1_2687	GO:0005102	GO:0005606	GO:0030155	GO:0030334	GO:0045995
T1_26874	GO:0008233
T1_26876	GO:0003677	GO:0005634	GO:0006355	GO:0035220
T1_26877	GO:0016787	GO:0016972	GO:0042246
T1_26890	GO:0000049
T1_26897	GO:0003774	GO:0003779	GO:0005524	GO:0005938	GO:0007498	GO:0016459	GO:0042623	GO:0048803	GO:0071907
T1_26906	GO:0003924	GO:0005525	GO:0005874	GO:0006184	GO:0007017	GO:0051258
T1_2691	GO:0004075	GO:0004485	GO:0005524	GO:0005759	GO:0006551	GO:0046872
T1_26913	GO:0000276	GO:0005811	GO:0008553	GO:0015986
T1_26934	GO:0003870	GO:0004813	GO:0005488	GO:0005759	GO:0006419	GO:0006783	GO:0040003
T1_26978	GO:0043565
T1_26984	GO:0007399
T1_27022	GO:0003779	GO:0005200	GO:0005524	GO:0005884	GO:0005885	GO:0006886	GO:0006911	GO:0007303	GO:0007413	GO:0007520	GO:0008335	GO:0022416	GO:0030027	GO:0030037	GO:0030589	GO:0030713	GO:0030833	GO:0045747	GO:0051491
T1_27033	GO:0022008
T1_27037	GO:0005737	GO:0008104	GO:0016021	GO:0042675	GO:0051018
T1_27045	GO:0008253
T1_27050	GO:0000166	GO:0004356	GO:0005737	GO:0006538	GO:0006542	GO:0007416	GO:0045213
T1_27066	GO:0016772
T1_27073	GO:0004497	GO:0009055	GO:0016705	GO:0020037	GO:0055114
T1_27089	GO:0005811	GO:0006090	GO:0016746	GO:0045254
T1_27094	GO:0003824	GO:0044237	GO:0044238
T1_27100	GO:0000166	GO:0017111
T1_27107	GO:0004364
T1_27109	GO:0008237	GO:0019538
T1_27116	GO:0004497	GO:0009055	GO:0016705	GO:0020037	GO:0055114
T1_27140	GO:0001964	GO:0005624	GO:0005886	GO:0006457	GO:0008021	GO:0016079	GO:0016191	GO:0031072	GO:0031987	GO:0043195	GO:0048854	GO:0051082
T1_2715	GO:0005488	GO:0043170	GO:0044238
T1_27150	GO:0008236
T1_27166	GO:0016787
T1_27169	GO:0005739	GO:0016937	GO:0050660	GO:0055114
T1_2717	GO:0005525	GO:0007264
T1_27170	GO:0016787
T1_27183	GO:0031966
T1_27186	GO:0005576	GO:0050832
T1_27210	GO:0016491
T1_27218	GO:0003735	GO:0005762	GO:0006412	GO:0019843
T1_27231	GO:0004835	GO:0042060
T1_2724	GO:0016740
T1_27245	GO:0000166	GO:0000381	GO:0003729	GO:0005686	GO:0007052	GO:0008187	GO:0008270	GO:0071011
T1_27252	GO:0016740
T1_27289	GO:0004152	GO:0005743	GO:0005758	GO:0006207
T1_2730	GO:0004767	GO:0005525	GO:0007264	GO:0015031
T1_27310	GO:0005975	GO:0016798	GO:0043169
T1_27324	GO:0004871	GO:0006915	GO:0030041	GO:0046330
T1_27346	GO:0000166	GO:0006099	GO:0006108	GO:0030060	GO:0044262
T1_27347	GO:0000819	GO:0005525	GO:0005764	GO:0007264
T1_27356	GO:0001932	GO:0005952	GO:0007015	GO:0007274	GO:0007591	GO:0008103	GO:0008355	GO:0008603	GO:0016301	GO:0019933	GO:0030551	GO:0045471
T1_27363	GO:0000166	GO:0004672	GO:0006468
T1_27369	GO:0008152
T1_27373	GO:0005789	GO:0016757
T1_27380	GO:0008152	GO:0016787
T1_27389	GO:0004175	GO:0005875	GO:0006508	GO:0008541
T1_27402	GO:0004588	GO:0004590	GO:0005875	GO:0006207
T1_27425	GO:0043231	GO:0044444
T1_27433	GO:0005622	GO:0046872
T1_27440	GO:0005515	GO:0016043
T1_27456	GO:0004872	GO:0005048	GO:0005783	GO:0005786	GO:0005811	GO:0005875	GO:0006621	GO:0016021
T1_27458	GO:0004872	GO:0005219	GO:0005509	GO:0005789	GO:0005875	GO:0006874	GO:0006936	GO:0016021	GO:0070588
T1_2746	GO:0003705	GO:0003730	GO:0005515	GO:0005634	GO:0005854	GO:0005875	GO:0007317	GO:0007355	GO:0007367	GO:0016015	GO:0017148	GO:0030371	GO:0045944	GO:0070201
T1_27468	GO:0004970	GO:0007616	GO:0016020	GO:0072375
T1_27487	GO:0005261	GO:0015672	GO:0016021
T1_27489	GO:0008236
T1_27497	GO:0004521	GO:0005634	GO:0005737	GO:0007630	GO:0016246	GO:0043565	GO:0050821
T1_27504	GO:0007275	GO:0009987	GO:0016020	GO:0040011	GO:0044464
T1_27519	GO:0000166	GO:0004155	GO:0055114
T1_27551	GO:0008750	GO:0015992	GO:0016021	GO:0050661	GO:0055114
T1_27563	GO:0005737
T1_27567	GO:0004096	GO:0005488	GO:0005777	GO:0006979	GO:0007031	GO:0008152	GO:0008340
T1_2759	GO:0016020
T1_27597	GO:0003824	GO:0044237	GO:0044238
T1_27599	GO:0005730	GO:0022008	GO:0042254
T1_27606	GO:0001700	GO:0003700	GO:0003707	GO:0005634	GO:0005975	GO:0006355	GO:0008270	GO:0043401	GO:0043565
T1_27609	GO:0000166	GO:0004672	GO:0005747	GO:0016310
T1_27610	GO:0000015	GO:0000287	GO:0004634	GO:0006096
T1_27613	GO:0003924	GO:0005525	GO:0006184	GO:0007264	GO:0016020
T1_27630	GO:0004312	GO:0005488	GO:0008152	GO:0016788
T1_27637	GO:0003779
T1_27638	GO:0006888	GO:0006891	GO:0008565	GO:0015031	GO:0016020	GO:0017119	GO:0022008	GO:0033227
T1_27646	GO:0005747	GO:0006120	GO:0008137	GO:0009055
T1_27648	GO:0019991	GO:0035151
T1_27656	GO:0003677	GO:0006915
T1_27664	GO:0008233
T1_27670	GO:0008233
T1_2769	GO:0005622
T1_27690	GO:0006974	GO:0007140	GO:0008584	GO:0032436	GO:0070864
T1_27695	GO:0005215
T1_27699	GO:0005488	GO:0042060
T1_27707	GO:0005793	GO:0005801	GO:0006810	GO:0016021	GO:0018991
T1_27720	GO:0004364	GO:0004602
T1_27725	GO:0004252	GO:0006508
T1_27728	GO:0016787
T1_2776	GO:0005488
T1_27760	GO:0009451	GO:0016853
T1_27780	GO:0004485	GO:0004658	GO:0005759	GO:0006550	GO:0006551	GO:0006567	GO:0006574	GO:0007563	GO:0009062	GO:0009087	GO:0016740
T1_278	GO:0005488	GO:0016787
T1_27810	GO:0000166	GO:0004686	GO:0005788	GO:0006468	GO:0006983	GO:0006986	GO:0010389	GO:0017148	GO:0043558
T1_27825	GO:0007389	GO:0008484	GO:0017015	GO:0030111	GO:0043231	GO:0044444	GO:0045879	GO:0045880
T1_27834	GO:0000045	GO:0005737
T1_27859	GO:0003743	GO:0005829	GO:0005852	GO:0005875	GO:0006413
T1_27862	GO:0016491	GO:0046872
T1_279	GO:0004540	GO:0008033	GO:0022008
T1_27908	GO:0006810	GO:0009987
T1_27919	GO:0016491
T1_27928	GO:0004407	GO:0005737	GO:0006099	GO:0006355	GO:0016575	GO:0022904
T1_27930	GO:0005488	GO:0016491
T1_27945	GO:0006810
T1_27962	GO:0008270
T1_27964	GO:0005875	GO:0006909	GO:0007015	GO:0007298	GO:0007417	GO:0007520	GO:0032863
T1_27977	GO:0003676	GO:0004824	GO:0005524	GO:0005737	GO:0005875	GO:0006430
T1_27986	GO:0016740
T1_27995	GO:0003924	GO:0004363	GO:0004373	GO:0005604	GO:0005834	GO:0006974	GO:0007186	GO:0007190	GO:0007268	GO:0007476	GO:0007528	GO:0007611	GO:0007632	GO:0010353	GO:0022416	GO:0035639	GO:0048148	GO:0050916
T1_28021	GO:0002121	GO:0005789	GO:0005794	GO:0007030	GO:0009953	GO:0016021	GO:0034389	GO:0035220	GO:0061357	GO:0070863	GO:0090263
T1_28050	GO:0030707
T1_28069	GO:0008238
T1_28070	GO:0005524	GO:0006950
T1_28085	GO:0001715	GO:0002168	GO:0003810	GO:0005160	GO:0005615	GO:0005768	GO:0007179	GO:0007313	GO:0007352	GO:0007354	GO:0007378	GO:0007393	GO:0007425	GO:0007427	GO:0007440	GO:0007450	GO:0007455	GO:0007458	GO:0007473	GO:0007474	GO:0007479	GO:0007498	GO:0007516	GO:0008285	GO:0008586	GO:0010002	GO:0010629	GO:0016015	GO:0030718	GO:0035147	GO:0035156	GO:0035158	GO:0035168	GO:0035217	GO:0035224	GO:0035263	GO:0035309	GO:0042078	GO:0042381	GO:0042803	GO:0045476	GO:0045570	GO:0045705	GO:0046843	GO:0046845	GO:0046982	GO:0048066	GO:0048100	GO:0048636
T1_28096	GO:0016021
T1_2810	GO:0016491
T1_28126	GO:0005488	GO:0042060
T1_28135	GO:0016787
T1_28159	GO:0005658	GO:0006260	GO:0016779	GO:0022008
T1_28164	GO:0004373	GO:0005978
T1_2818	GO:0004711	GO:0006911	GO:0006974	GO:0007015	GO:0007411	GO:0008340	GO:0016239	GO:0030536	GO:0045793	GO:0045927	GO:0048477	GO:0048786	GO:0048813	GO:0051124
T1_28180	GO:0000122	GO:0005515	GO:0016581
T1_28183	GO:0008152	GO:0046872
T1_28184	GO:0051213
T1_28197	GO:0005488	GO:0008152
T1_28199	GO:0005515	GO:0005783	GO:0005794	GO:0007224	GO:0008101	GO:0008194	GO:0015014	GO:0016055	GO:0016758	GO:0030206	GO:0030210
T1_28218	GO:0000166	GO:0008270	GO:0009058	GO:0016491	GO:0016747	GO:0016788	GO:0055114
T1_28220	GO:0004364	GO:0004734	GO:0005737	GO:0008152	GO:0016782	GO:0045174
T1_28226	GO:0005783	GO:0007030
T1_28227	GO:0005509	GO:0005788	GO:0007030
T1_28249	GO:0004252	GO:0006508
T1_28250	GO:0004252	GO:0006508
T1_28257	GO:0004035	GO:0016311
T1_28258	GO:0004035	GO:0016311
T1_28308	GO:0004758	GO:0005886	GO:0007444	GO:0030148
T1_28337	GO:0004601	GO:0006979	GO:0020037	GO:0055114
T1_28338	GO:0016491
T1_28347	GO:0000278	GO:0022402	GO:0044424
T1_28358	GO:0004312	GO:0016788
T1_28366	GO:0016740
T1_28402	GO:0004029	GO:0006081	GO:0055114
T1_28409	GO:0004252	GO:0006508
T1_28419	GO:0008237
T1_28424	GO:0000151	GO:0005770	GO:0008593	GO:0035220	GO:0050699
T1_28429	GO:0000166	GO:0004826	GO:0005739	GO:0006432
T1_28440	GO:0006458	GO:0016272	GO:0048487	GO:0051082	GO:0051087	GO:0051297	GO:0090306	GO:0090307
T1_28447	GO:0004134	GO:0004135	GO:0005975
T1_28452	GO:0008233
T1_28453	GO:0005840	GO:0006950
T1_28454	GO:0008233
T1_2846	GO:0005737	GO:0005886	GO:0007417
T1_28465	GO:0000145	GO:0016080	GO:0016081
T1_28481	GO:0003676	GO:0004004	GO:0005524	GO:0022008
T1_28483	GO:0008152	GO:0016787
T1_28489	GO:0005488
T1_28500	GO:0004361	GO:0005759	GO:0005875	GO:0006554	GO:0006568	GO:0046948	GO:0050660	GO:0055114
T1_28529	GO:0004827	GO:0005524	GO:0005737	GO:0006433	GO:0015986	GO:0046933
T1_28539	GO:0005506	GO:0005739	GO:0016226	GO:0051536
T1_28540	GO:0005622	GO:0008270	GO:0016787	GO:0044238
T1_28553	GO:0000022	GO:0003735	GO:0005634	GO:0005811	GO:0005875	GO:0006412	GO:0007275	GO:0022627
T1_28564	GO:0004679	GO:0006974	GO:0016310	GO:0035090	GO:0070050
T1_28580	GO:0048513
T1_28597	GO:0003676	GO:0004298	GO:0005839	GO:0006139	GO:0008408	GO:0051603
T1_28610	GO:0003824
T1_28620	GO:0016021	GO:0022857	GO:0055085
T1_28621	GO:0005829	GO:0005844	GO:0047499
T1_28624	GO:0005783	GO:0032313
T1_28625	GO:0005783	GO:0032313
T1_28645	GO:0003676	GO:0005524	GO:0008026
T1_28648	GO:0016020
T1_28670	GO:0001510	GO:0003676	GO:0004872	GO:0005509	GO:0005544	GO:0005634	GO:0006364	GO:0008168
T1_28679	GO:0008152
T1_28692	GO:0016787
T1_28708	GO:0003676	GO:0005811	GO:0005840	GO:0022008	GO:0034645	GO:0044238
T1_28749	GO:0005792	GO:0006694	GO:0009055	GO:0016020	GO:0016713	GO:0020037	GO:0055114
T1_28766	GO:0005328	GO:0006836	GO:0016021
T1_28779	GO:0016787
T1_28781	GO:0007638	GO:0008381	GO:0071260
T1_2879	GO:0016772
T1_28850	GO:0007286	GO:0036126
T1_28858	GO:0016788
T1_28870	GO:0000398	GO:0002121	GO:0003723	GO:0007476	GO:0008270	GO:0022008	GO:0071011
T1_28896	GO:0003824
T1_28907	GO:0006607	GO:0006900	GO:0007184	GO:0010629	GO:0035293
T1_28910	GO:0000062	GO:0042049
T1_28939	GO:0016020
T1_28952	GO:0003924	GO:0005198	GO:0005525	GO:0005737	GO:0005874	GO:0006184	GO:0007018	GO:0051258
T1_28954	GO:0003924	GO:0005198	GO:0005525	GO:0005737	GO:0005874	GO:0006184	GO:0007018	GO:0051258
T1_28955	GO:0003924	GO:0005200	GO:0005525	GO:0005737	GO:0005874	GO:0006184	GO:0007018	GO:0016203	GO:0045298	GO:0051258	GO:0051298
T1_28968	GO:0001700	GO:0004683	GO:0005524	GO:0005634	GO:0006468	GO:0007095	GO:0007348	GO:0007349	GO:0007444	GO:0009314	GO:0016321	GO:0030162	GO:0031151	GO:0042060	GO:0046331	GO:0051225	GO:0051299
T1_28976	GO:0005747	GO:0006120	GO:0008137	GO:0022008
T1_290	GO:0000166	GO:0004812
T1_29014	GO:0006810	GO:0015116	GO:0016020
T1_29016	GO:0006810	GO:0015116	GO:0016020
T1_2902	GO:0004748	GO:0005971	GO:0006260	GO:0006919	GO:0009186	GO:0022008	GO:0046914	GO:0055114
T1_29027	GO:0000212	GO:0000915	GO:0007110	GO:0007111	GO:0007112	GO:0051225
T1_29033	GO:0000166	GO:0008270	GO:0016491	GO:0055114
T1_29034	GO:0000166	GO:0008270	GO:0016491	GO:0055114
T1_2905	GO:0016020
T1_29053	GO:0001077	GO:0003677	GO:0005634	GO:0007496	GO:0007498	GO:0007507	GO:0007520	GO:0016202	GO:0030707	GO:0032968	GO:0045475	GO:0046983	GO:0048747
T1_29058	GO:0005488
T1_29063	GO:0003824
T1_29075	GO:0003735	GO:0005840	GO:0006412	GO:0006508	GO:0008237	GO:0008270	GO:0019370
T1_29076	GO:0001707	GO:0006048	GO:0016868	GO:0045743	GO:0060438
T1_29089	GO:0003934	GO:0005737	GO:0006728	GO:0006729	GO:0008363	GO:0009880	GO:0035185	GO:0043095	GO:0046654	GO:0048067	GO:0048072	GO:0060308	GO:2000274
T1_2909	GO:0009987
T1_29104	GO:0004084	GO:0005739	GO:0009082
T1_29111	GO:0003700	GO:0005634	GO:0006979	GO:0007317	GO:0008103	GO:0008340	GO:0008359	GO:0042070	GO:0045944	GO:0046982	GO:0060322	GO:0060465
T1_29158	GO:0000166	GO:0000245	GO:0000381	GO:0003729	GO:0005686	GO:0007052	GO:0008187	GO:0022008	GO:0046982	GO:0051168	GO:0071011
T1_2916	GO:0004748	GO:0009186	GO:0046914	GO:0055114
T1_29174	GO:0008152	GO:0016491
T1_29180	GO:0005576	GO:0031640	GO:0050832
T1_29185	GO:0005112	GO:0005634	GO:0007219	GO:0042254
T1_29199	GO:0000287	GO:0003924	GO:0005525	GO:0006184
T1_29211	GO:0032006	GO:0040011
T1_29227	GO:0000166	GO:0003729	GO:0005634	GO:0008344	GO:0045886
T1_29228	GO:0004312	GO:0005488	GO:0008152	GO:0016788
T1_2925	GO:0003824	GO:0005488	GO:0008152	GO:0020011
T1_29257	GO:0000347	GO:0031990
T1_29259	GO:0003924	GO:0005198	GO:0005525	GO:0005737	GO:0005874	GO:0006184	GO:0007018	GO:0051258
T1_29266	GO:0000902	GO:0005515	GO:0005634	GO:0005737	GO:0005886	GO:0007616	GO:0008355	GO:0016028	GO:0042052	GO:0046872
T1_29270	GO:0003824
T1_29287	GO:0000275	GO:0000276	GO:0005811	GO:0006911	GO:0008553	GO:0015986	GO:0046331
T1_29297	GO:0009987	GO:0043170	GO:0050789
T1_29312	GO:0004721	GO:0005634
T1_29321	GO:0022008
T1_29328	GO:0052689
T1_29358	GO:0016810	GO:0046872
T1_29366	GO:0005515	GO:0005634	GO:0005737	GO:0006911	GO:0007391	GO:0042051	GO:0046330	GO:0072686
T1_29374	GO:0007015	GO:0007155	GO:0008360	GO:0016308	GO:0046854
T1_29375	GO:0009987
T1_29382	GO:0003700	GO:0005634	GO:0006355	GO:0032502	GO:0043565
T1_29383	GO:0006629
T1_29412	GO:0006457	GO:0031072	GO:0051082
T1_29414	GO:0003678	GO:0003713	GO:0005524	GO:0006281	GO:0006310	GO:0006355	GO:0007049	GO:0016568	GO:0030111	GO:0031011	GO:0032508	GO:0042127	GO:0051301
T1_29420	GO:0004768	GO:0005506	GO:0005783	GO:0006633	GO:0016021	GO:0055114
T1_29432	GO:0005840
T1_29433	GO:0004126	GO:0008270	GO:0009972
T1_29444	GO:0003824
T1_29451	GO:0000022	GO:0003735	GO:0006412	GO:0022625	GO:0051298
T1_29457	GO:0005703	GO:0005863	GO:0006364	GO:0006941	GO:0007427	GO:0007517	GO:0007527	GO:0008307	GO:0030241	GO:0030898	GO:0031427	GO:0031672	GO:0042626	GO:0042803	GO:0060361
T1_29463	GO:0022008
T1_29466	GO:0003824
T1_29481	GO:0000062
T1_29502	GO:0003924
T1_29505	GO:0004197	GO:0010165	GO:0016322	GO:0035070	GO:0035103	GO:0046672	GO:0048515
T1_29531	GO:0004830	GO:0005524	GO:0005737	GO:0006436	GO:0022008
T1_29532	GO:0008152	GO:0052689
T1_29536	GO:0016757
T1_29557	GO:0009987
T1_29560	GO:0004372	GO:0005739	GO:0006544	GO:0006564	GO:0006730	GO:0008168	GO:0030170	GO:0032259	GO:0048149
T1_29561	GO:0003824
T1_29578	GO:0008270	GO:0051298
T1_29595	GO:0003824	GO:0005488	GO:0006281
T1_29608	GO:0004419	GO:0005759	GO:0005875	GO:0006551
T1_29614	GO:0005488
T1_29618	GO:0016787
T1_29620	GO:0000738	GO:0003676	GO:0004534	GO:0005730	GO:0008270	GO:0022008
T1_29624	GO:0000398	GO:0071011	GO:0071013
T1_29626	GO:0004497	GO:0009055	GO:0016705	GO:0020037	GO:0055114
T1_29634	GO:0005885	GO:0016918
T1_29635	GO:0000166	GO:0007422
T1_29645	GO:0005730	GO:0005732	GO:0030515	GO:0030559	GO:0031118
T1_29649	GO:0003743	GO:0005829	GO:0005851	GO:0006413	GO:0030234	GO:0046331
T1_2965	GO:0005371	GO:0005740	GO:0006810	GO:0016020	GO:0035071
T1_29665	GO:0000221	GO:0005886	GO:0008553	GO:0015991	GO:0046961
T1_29675	GO:0005744	GO:0006626	GO:0015450
T1_29687	GO:0003700	GO:0005515	GO:0006355	GO:0007409	GO:0008270	GO:0016458	GO:0030708	GO:0030713	GO:0035102
T1_29694	GO:0000166	GO:0042350	GO:0050577	GO:0050662	GO:0055114
T1_29720	GO:0003824
T1_29726	GO:0046331
T1_29729	GO:0022008
T1_29744	GO:0003700	GO:0005634	GO:0006355	GO:0043565
T1_29750	GO:0000166	GO:0005811	GO:0016491	GO:0055114
T1_29753	GO:0003824
T1_29754	GO:0003824
T1_29763	GO:0004032	GO:0055114
T1_29775	GO:0003924	GO:0004767	GO:0005525	GO:0005886	GO:0006184	GO:0007264	GO:0007298	GO:0007391	GO:0007464	GO:0008593	GO:0022604	GO:0030165	GO:0045087	GO:0046329
T1_29777	GO:0016787
T1_29784	GO:0003824
T1_29806	GO:0042302
T1_29817	GO:0000398	GO:0003677	GO:0003725	GO:0005524	GO:0005730	GO:0006955	GO:0016740	GO:0045893	GO:0071011	GO:0071013
T1_29819	GO:0004871	GO:0006355	GO:0007165
T1_29820	GO:0004871	GO:0006355	GO:0007165
T1_29821	GO:0004674
T1_29822	GO:0004672
T1_29829	GO:0003676	GO:0005634	GO:0008270
T1_29830	GO:0005488
T1_29832	GO:0005622	GO:0046872
T1_29834	GO:0005509	GO:0005743	GO:0005811	GO:0006839	GO:0016021	GO:0022857	GO:0042060	GO:0055085
T1_29835	GO:0005737	GO:0006730	GO:0008168	GO:0009058	GO:0009258	GO:0016155	GO:0016620	GO:0016742	GO:0032259	GO:0055114
T1_29843	GO:0008152	GO:0016491
T1_29847	GO:0004300	GO:0005759	GO:0005811	GO:0005875	GO:0006635
T1_29848	GO:0004418
T1_29864	GO:0000977	GO:0004879	GO:0006351	GO:0042594	GO:0042632	GO:0046872	GO:0070328	GO:0070873
T1_29869	GO:0008233
T1_29879	GO:0004872
T1_29885	GO:0004252	GO:0005576	GO:0009950	GO:0031638
T1_29895	GO:0008152	GO:0009987
T1_29915	GO:0016021	GO:0048149
T1_29928	GO:0000166	GO:0003676
T1_29937	GO:0005654	GO:0006378	GO:0016973	GO:0031965
T1_29940	GO:0001555	GO:0005789	GO:0006887	GO:0007018	GO:0007029	GO:0007296	GO:0007303	GO:0008407	GO:0051686
T1_29941	GO:0000145	GO:0005768	GO:0007298	GO:0007411	GO:0016080	GO:0016081	GO:0022416	GO:0031410	GO:0032456	GO:0042331	GO:0043679
T1_29944	GO:0016614
T1_29947	GO:0003743	GO:0005829	GO:0005852	GO:0006413
T1_29948	GO:0004872	GO:0005634	GO:0035212	GO:0043066	GO:0046329
T1_29957	GO:0016787
T1_29958	GO:0006629	GO:0016787
T1_29960	GO:0004181	GO:0006508	GO:0008270
T1_29962	GO:0005811	GO:0005875	GO:0008152	GO:0016747
T1_29985	GO:0001700
T1_29994	GO:0003735	GO:0005763	GO:0006412
T1_29995	GO:0005759	GO:0009055	GO:0046872	GO:0051537
T1_3001	GO:0003746	GO:0003924	GO:0005525	GO:0005737	GO:0006184	GO:0006414
T1_30010	GO:0008233	GO:0022008
T1_30011	GO:0008237	GO:0022008	GO:0046872
T1_30025	GO:0004653	GO:0005794	GO:0009312
T1_30030	GO:0016021
T1_30034	GO:0005216	GO:0006811
T1_30041	GO:0005009	GO:0005242	GO:0005488	GO:0005899	GO:0005911	GO:0006813	GO:0006974	GO:0006979	GO:0007285	GO:0007390	GO:0007411	GO:0007446	GO:0007623	GO:0007626	GO:0008284	GO:0008286	GO:0008340	GO:0008361	GO:0034059	GO:0040014	GO:0042220	GO:0042391	GO:0045927	GO:0046620	GO:0046777	GO:0048132	GO:0048133	GO:0060180	GO:0060250	GO:2000377
T1_30042	GO:0005216	GO:0006811
T1_30043	GO:0005768	GO:0016021
T1_30044	GO:0007476	GO:0007613	GO:0007626
T1_30057	GO:0022008
T1_30060	GO:0004301	GO:0005789	GO:0005792	GO:0009636	GO:0016021	GO:0016491	GO:0019439	GO:0033961
T1_30066	GO:0004478	GO:0005524	GO:0006556	GO:0006730	GO:0022416	GO:0035220	GO:0046872
T1_30069	GO:0016491
T1_30075	GO:0003746	GO:0003924	GO:0005525	GO:0005811	GO:0005853	GO:0006184	GO:0006414	GO:0022008
T1_30081	GO:0004829	GO:0005524	GO:0005737	GO:0006435	GO:0022008
T1_30091	GO:0016491
T1_30093	GO:0042982	GO:0070628
T1_30094	GO:0005506	GO:0016491
T1_30095	GO:0000398	GO:0003676	GO:0030532	GO:0071011	GO:0071013
T1_30103	GO:0003676	GO:0004364	GO:0005737	GO:0007095	GO:0022008	GO:0043295
T1_30104	GO:0000166	GO:0003910	GO:0005737	GO:0006281	GO:0043596
T1_30113	GO:0004768	GO:0005506	GO:0005783	GO:0006633	GO:0016021	GO:0055114
T1_30121	GO:0005093	GO:0005875	GO:0007269	GO:0008021	GO:0015031	GO:0016192
T1_30131	GO:0004312	GO:0016788
T1_30132	GO:0005488	GO:0005811	GO:0008152	GO:0016297
T1_30144	GO:0004122	GO:0005737	GO:0006535	GO:0008340	GO:0019343	GO:0030170
T1_30146	GO:0009987	GO:0016043	GO:0051179
T1_30155	GO:0003743	GO:0005737	GO:0006413
T1_30159	GO:0005524	GO:0005829	GO:0016226	GO:0017111	GO:0046872	GO:0051539
T1_30163	GO:0031427
T1_30167	GO:0000705	GO:0001666	GO:0004332	GO:0004674	GO:0005524	GO:0006096	GO:0006468	GO:0007094	GO:0007095	GO:0007100	GO:0007498	GO:0016321	GO:0030018	GO:0031430	GO:0032837	GO:0043060	GO:0051322
T1_30170	GO:0000166	GO:0016491
T1_30179	GO:0004702	GO:0005524	GO:0006468	GO:0007015
T1_30189	GO:0003756
T1_30212	GO:0003096	GO:0005903	GO:0015385
T1_30220	GO:0007031	GO:0007399
T1_30224	GO:0016787
T1_30228	GO:0016021	GO:0022857	GO:0055085
T1_30232	GO:0016740
T1_30245	GO:0046331
T1_30247	GO:0003014	GO:0005215	GO:0006810
T1_30248	GO:0005385	GO:0006812	GO:0016021	GO:0055085
T1_30260	GO:0000502
T1_3027	GO:0003676	GO:0044260	GO:0090304
T1_30272	GO:0000910	GO:0004594	GO:0005524	GO:0005737	GO:0005819	GO:0005886	GO:0007059	GO:0007067	GO:0007126	GO:0007283	GO:0007476	GO:0015937	GO:0016044	GO:0016310	GO:0040011	GO:0048477	GO:0070328
T1_3028	GO:0004630	GO:0007154	GO:0032440	GO:0035091	GO:0055114	GO:0070290
T1_30281	GO:0008643	GO:0016021	GO:0022891	GO:0055085
T1_30298	GO:0003735	GO:0005744	GO:0005762	GO:0006412	GO:0006886	GO:0015450
T1_30339	GO:0016740	GO:0016884
T1_30359	GO:0016020	GO:0045169
T1_30360	GO:0008233
T1_30369	GO:0003824
T1_30376	GO:0000270	GO:0004040	GO:0005515	GO:0005576	GO:0005887	GO:0006955	GO:0008745	GO:0016045	GO:0042834	GO:0050830	GO:0061060
T1_30377	GO:0016787
T1_30378	GO:0016787
T1_30387	GO:0004177	GO:0006508	GO:0008235	GO:0008270	GO:0009987
T1_30398	GO:0003824
T1_30400	GO:0005739	GO:0006911	GO:0008340	GO:0008379	GO:0042744	GO:0043066	GO:0045454	GO:0055114
T1_30401	GO:0000166	GO:0000983	GO:0001077	GO:0001103	GO:0001706	GO:0001710	GO:0002805	GO:0005634	GO:0005739	GO:0006911	GO:0006952	GO:0007179	GO:0007350	GO:0007390	GO:0007391	GO:0007398	GO:0007435	GO:0007494	GO:0007503	GO:0007510	GO:0007516	GO:0008258	GO:0008354	GO:0008407	GO:0030717	GO:0035050	GO:0035162	GO:0035167	GO:0042440	GO:0042690	GO:0043565	GO:0045892	GO:0045944	GO:0046665	GO:0046982	GO:0050567	GO:0060047	GO:0061320
T1_30422	GO:0003676	GO:0005524	GO:0008026
T1_30428	GO:0003824	GO:0044237	GO:0044238
T1_3043	GO:0005634	GO:0005737	GO:0005876
T1_30430	GO:0003735	GO:0005762	GO:0006412
T1_30434	GO:0016021
T1_30447	GO:0003735	GO:0005763	GO:0006412
T1_30458	GO:0005635	GO:0005654	GO:0005737	GO:0016973
T1_30467	GO:0016491
T1_3047	GO:0005488
T1_30471	GO:0004307	GO:0008654	GO:0016020
T1_30480	GO:0009987	GO:0016043
T1_30482	GO:0003774	GO:0005868	GO:0007052	GO:0007067	GO:0007409	GO:0008088	GO:0042623	GO:0048477	GO:0048814
T1_30489	GO:0005198	GO:0006890	GO:0030126
T1_30501	GO:0003700	GO:0005634	GO:0006355	GO:0007517	GO:0035071	GO:0048813
T1_30520	GO:0004312	GO:0016788
T1_30528	GO:0022008
T1_30542	GO:0004252	GO:0005795	GO:0005886	GO:0006508	GO:0030173
T1_30548	GO:0000980	GO:0001964	GO:0003700	GO:0005509	GO:0005615	GO:0005634	GO:0005788	GO:0005811	GO:0006457	GO:0007422	GO:0007476	GO:0007591	GO:0022008	GO:0030246	GO:0031987	GO:0035073	GO:0035074	GO:0042048	GO:0045169	GO:0045944	GO:0046982	GO:0048854	GO:0051082
T1_30549	GO:0001666	GO:0005886	GO:0006810	GO:0048190
T1_30560	GO:0003824	GO:0005324	GO:0005886	GO:0008152	GO:0015909
T1_30568	GO:0020037
T1_30589	GO:0000166	GO:0016614	GO:0055114
T1_30608	GO:0004252	GO:0006508
T1_30631	GO:0003824
T1_30636	GO:0005509	GO:0005743	GO:0005811	GO:0006839	GO:0016021	GO:0022857	GO:0042060	GO:0055085
T1_30637	GO:0030707
T1_30644	GO:0004367	GO:0005811	GO:0005975	GO:0006127	GO:0006641	GO:0007629	GO:0009331	GO:0030018	GO:0031430	GO:0042803	GO:0046168	GO:0051287
T1_30668	GO:0016787
T1_30670	GO:0005783	GO:0005811	GO:0006614	GO:0006911	GO:0016020
T1_30671	GO:0005515	GO:0005739	GO:0022008
T1_30672	GO:0004725	GO:0008138	GO:0035335
T1_3068	GO:0003678	GO:0005524	GO:0032508
T1_30686	GO:0004733	GO:0008615	GO:0010181	GO:0042823	GO:0055114
T1_30687	GO:0044238	GO:0044260
T1_30696	GO:0004411	GO:0006559	GO:0006572	GO:0055114
T1_30703	GO:0003676	GO:0016787	GO:0046872
T1_30704	GO:0003676	GO:0016787	GO:0046872
T1_30707	GO:0004674	GO:0004712	GO:0005524	GO:0006468	GO:0007420	GO:0007623	GO:0007632	GO:0008355
T1_30720	GO:0008233
T1_30798	GO:0004181	GO:0006508	GO:0008270
T1_30803	GO:0008152	GO:0016020	GO:0016491
T1_30812	GO:0005326	GO:0005416	GO:0005887	GO:0006811	GO:0015175	GO:0015179	GO:0015370	GO:0015804	GO:0015807	GO:0042940	GO:0042943
T1_30816	GO:0004674	GO:0005634	GO:0005829	GO:0005956	GO:0008062	GO:0016319	GO:0019887	GO:0022008	GO:0045475	GO:0045859
T1_30826	GO:0005506	GO:0016491
T1_3083	GO:0008152	GO:0016853
T1_30833	GO:0003824
T1_30850	GO:0005215
T1_30867	GO:0001838	GO:0004100	GO:0006035	GO:0007430	GO:0007443	GO:0008362	GO:0009611	GO:0016021	GO:0035158	GO:0035159	GO:0060439
T1_30874	GO:0006665	GO:0008206	GO:0008422	GO:0016021	GO:0016139	GO:0044464
T1_30882	GO:0005737	GO:0006914	GO:0015031
T1_30899	GO:0051213
T1_30907	GO:0000398	GO:0006351	GO:0071011	GO:0071013
T1_30910	GO:0004252	GO:0005886	GO:0006508	GO:0015370
T1_30932	GO:0008429
T1_30933	GO:0006631	GO:0016627	GO:0055114
T1_30946	GO:0000278	GO:0003746	GO:0003924	GO:0005525	GO:0005739	GO:0006184	GO:0006414	GO:0007030	GO:0008283
T1_30956	GO:0016787
T1_30962	GO:0004197	GO:0006508	GO:0050790
T1_30966	GO:0003677	GO:0003700	GO:0005634	GO:0006355
T1_30969	GO:0016614
T1_30979	GO:0004301	GO:0005789	GO:0005792	GO:0009636	GO:0016021	GO:0016491	GO:0019439	GO:0033961
T1_30996	GO:0001676	GO:0004321	GO:0004467	GO:0045289	GO:0046949
T1_30997	GO:0003824
T1_3103	GO:0002119	GO:0004748	GO:0005524	GO:0005971	GO:0006260	GO:0009792	GO:0040007	GO:0040017	GO:0040035	GO:0055114
T1_31030	GO:0004872
T1_31031	GO:0005215	GO:0009987	GO:0016887	GO:0043234
T1_31040	GO:0008354	GO:0016791
T1_31041	GO:0000042	GO:0005783	GO:0009950	GO:0016485	GO:0040014	GO:0048856
T1_31045	GO:0007498	GO:0008157	GO:0030018
T1_31046	GO:0007498	GO:0008157	GO:0030018
T1_31052	GO:0016787
T1_31056	GO:0016787
T1_31069	GO:0004726	GO:0006470	GO:0006911	GO:0022008
T1_31074	GO:0009116	GO:0016310	GO:0017061
T1_31079	GO:0008253
T1_31080	GO:0016788
T1_31081	GO:0016798
T1_31084	GO:0005576
T1_31085	GO:0007424	GO:0007475	GO:0008355	GO:0008362	GO:0040005	GO:0045177
T1_3109	GO:0000166	GO:0003954	GO:0050662
T1_31090	GO:0000137	GO:0005783	GO:0015012	GO:0016021	GO:0046963	GO:0046964
T1_31101	GO:0004181	GO:0006508	GO:0008270
T1_31103	GO:0004181	GO:0006508	GO:0008270
T1_31115	GO:0000165	GO:0000186	GO:0004709	GO:0005524
T1_31127	GO:0016614
T1_31128	GO:0008643	GO:0016021	GO:0022891	GO:0055085
T1_31143	GO:0005737	GO:0015629
T1_31147	GO:0005634	GO:0005705	GO:0006355	GO:0048471	GO:0050821	GO:2000495
T1_31149	GO:0000398	GO:0005687	GO:0005688	GO:0016740	GO:0017070	GO:0030621	GO:0071011	GO:0071013
T1_31170	GO:0008233
T1_31171	GO:0004715	GO:0005524	GO:0006468	GO:0009190	GO:0016021	GO:0016849
T1_31184	GO:0000398	GO:0003676	GO:0007052	GO:0007067	GO:0022008	GO:0030532	GO:0071011	GO:0071013
T1_31185	GO:0004672	GO:0044237
T1_31188	GO:0016491
T1_31191	GO:0004497	GO:0009055	GO:0016705	GO:0020037	GO:0055114
T1_31193	GO:0003824
T1_31197	GO:0005759	GO:0008260	GO:0046952
T1_31204	GO:0000152	GO:0001745	GO:0004842	GO:0006511	GO:0006919	GO:0007291	GO:0007409	GO:0007476	GO:0016567	GO:0019005	GO:0030162	GO:0030431	GO:0031463	GO:0031625	GO:0048813
T1_31212	GO:0016791	GO:0035233
T1_31217	GO:0004842	GO:0016567
T1_31219	GO:0016226	GO:0046872	GO:0051539
T1_3122	GO:0003676
T1_31226	GO:0003676	GO:0030529
T1_31229	GO:0008152	GO:0008236
T1_31237	GO:0016757
T1_31244	GO:0008152	GO:0016491
T1_31247	GO:0016791
T1_31253	GO:0001737	GO:0004674	GO:0005938	GO:0007015	GO:0007294	GO:0007298	GO:0007317	GO:0007318	GO:0008360	GO:0016310	GO:0016323	GO:0016325	GO:0019730	GO:0030111	GO:0030709	GO:0031594	GO:0045169	GO:0045172	GO:0045185	GO:0050321	GO:0051124	GO:0051663	GO:0061174	GO:0090176
T1_31256	GO:0046331
T1_31265	GO:0005506	GO:0016491
T1_31274	GO:0008233
T1_3128	GO:0004588	GO:0006221	GO:0009116
T1_31289	GO:0004497	GO:0009055	GO:0016705	GO:0020037	GO:0055114
T1_3129	GO:0008152	GO:0016491
T1_31290	GO:0003796	GO:0019730	GO:0035071
T1_31293	GO:0005506	GO:0016491
T1_3131	GO:0005096	GO:0005622	GO:0043547	GO:0051056
T1_31312	GO:0005743	GO:0042719	GO:0045039	GO:0046872
T1_31346	GO:0016757
T1_31363	GO:0004588	GO:0004590	GO:0005875	GO:0006207	GO:0044205
T1_31367	GO:0007291	GO:0007591	GO:0016125	GO:0032374	GO:0045456
T1_31376	GO:0008146	GO:0046872
T1_31379	GO:0005739	GO:0005811
T1_31380	GO:0004148	GO:0005811	GO:0005947	GO:0005960	GO:0006099	GO:0006546	GO:0006748	GO:0045454	GO:0050660
T1_31394	GO:0004721	GO:0005083	GO:0007475	GO:0043508	GO:0046329
T1_31402	GO:0006486	GO:0008375	GO:0035220
T1_31404	GO:0000175	GO:0000176	GO:0000177	GO:0003723	GO:0005652	GO:0006397	GO:0010468
T1_31406	GO:0005858	GO:0007018	GO:0016319	GO:0042623	GO:0048813
T1_31413	GO:0052689
T1_31427	GO:0003012
T1_31430	GO:0004758	GO:0017059
T1_31435	GO:0005886	GO:0016021	GO:0016192	GO:0019717	GO:0030054	GO:0030672
T1_31436	GO:0005488	GO:0016740	GO:0044237	GO:0044238
T1_31464	GO:0005886	GO:0015149	GO:0015771	GO:0044425
T1_31466	GO:0004768	GO:0005886	GO:0006633	GO:0007053	GO:0007283	GO:0016006	GO:0016021	GO:0042284	GO:0055114	GO:0070938
T1_31472	GO:0004689	GO:0005516	GO:0005524	GO:0005964	GO:0005978	GO:0006007	GO:0006468	GO:0048598
T1_31482	GO:0005488
T1_31495	GO:0008152
T1_31499	GO:0003824
T1_31506	GO:0005975	GO:0042132
T1_31515	GO:0005783	GO:0008152	GO:0016491	GO:0016803	GO:0042221	GO:0044425
T1_31528	GO:0000398	GO:0003676	GO:0007052	GO:0030532	GO:0071011	GO:0071013
T1_31529	GO:0016787
T1_31542	GO:0001758	GO:0055114
T1_31549	GO:0005856	GO:0007010	GO:0007298	GO:0007301	GO:0008360	GO:0043234	GO:0048260	GO:0070064	GO:0070864
T1_31555	GO:0005960	GO:0019464
T1_31565	GO:0004721	GO:0016311
T1_31568	GO:0004497	GO:0005506	GO:0016705
T1_31569	GO:0016491
T1_31585	GO:0001666	GO:0008354	GO:0015893	GO:0016021	GO:0022857	GO:0031427	GO:0042623	GO:0055085
T1_31587	GO:0004000	GO:0008083	GO:0008283	GO:0042386
T1_31592	GO:0003723	GO:0003964	GO:0005942	GO:0006278	GO:0016301	GO:0035014	GO:0043551
T1_31599	GO:0003824
T1_31603	GO:0006810
T1_31628	GO:0008234	GO:0044424
T1_31631	GO:0016787
T1_31632	GO:0008152	GO:0016773
T1_31638	GO:0004582
T1_31642	GO:0042982	GO:0070628
T1_31663	GO:0003824
T1_31679	GO:0009987
T1_31688	GO:0003723
T1_31690	GO:0004497	GO:0009055	GO:0016705	GO:0020037	GO:0055114
T1_31693	GO:0002121	GO:0016757
T1_31694	GO:0004091	GO:0006629	GO:0016298	GO:0022416	GO:0035220
T1_3170	GO:0005488	GO:0009987	GO:0016820	GO:0016887
T1_31702	GO:0016787
T1_31710	GO:0003700	GO:0005634	GO:0008270
T1_31722	GO:0005488
T1_31723	GO:0006508	GO:0008239	GO:0008240
T1_31724	GO:0008610	GO:0016717
T1_31732	GO:0007611	GO:0044444
T1_31751	GO:0004300
T1_31752	GO:0003924	GO:0003956	GO:0004871	GO:0005525	GO:0005622	GO:0006471	GO:0007264	GO:0007269	GO:0015031	GO:0016197	GO:0048488	GO:0048749
T1_31763	GO:0000902	GO:0009306
T1_31766	GO:0006950	GO:0035220
T1_31774	GO:0005740	GO:0016021	GO:0022857	GO:0055085
T1_31781	GO:0016192
T1_31782	GO:0003924	GO:0005525	GO:0005739	GO:0006184	GO:0016020
T1_31786	GO:0007276
T1_31789	GO:0006464	GO:0016740
T1_31795	GO:0003824
T1_31803	GO:0005875	GO:0007616
T1_31812	GO:0016787
T1_3182	GO:0005524	GO:0006950	GO:0016491
T1_31835	GO:0004252	GO:0005739	GO:0006508
T1_31837	GO:0003707	GO:0004879	GO:0005634	GO:0006355	GO:0007492	GO:0007498	GO:0008270	GO:0008610	GO:0016042	GO:0034440	GO:0043401	GO:0043565
T1_31847	GO:0005488
T1_31882	GO:0016614
T1_31908	GO:0016787
T1_31919	GO:0003723	GO:0005849	GO:0006379	GO:0022008
T1_3192	GO:0005811	GO:0005840
T1_31921	GO:0003096	GO:0005903	GO:0015385
T1_31935	GO:0007498	GO:0008466
T1_31948	GO:0008152	GO:0016020	GO:0016803	GO:0042221	GO:0044464
T1_31954	GO:0006810	GO:0009987	GO:0022857
T1_3196	GO:0007507	GO:0008241
T1_31990	GO:0003924	GO:0005509	GO:0005525	GO:0005622	GO:0006974	GO:0007155	GO:0007264	GO:0007298	GO:0007498	GO:0008360	GO:0016020	GO:0035011
T1_31991	GO:0003700	GO:0006355	GO:0043565	GO:0046983
T1_31993	GO:0000166	GO:0003676	GO:0005509	GO:0032440	GO:0055114
T1_31996	GO:0005886	GO:0008340	GO:0010889	GO:0015137	GO:0015141
T1_31997	GO:0005215	GO:0006833	GO:0016021	GO:0055085
T1_32007	GO:0005509
T1_32013	GO:0005509
T1_32015	GO:0000226	GO:0005200	GO:0005886	GO:0007016	GO:0007528	GO:0008092	GO:0031594	GO:0036062	GO:0042734	GO:0043195	GO:0048675	GO:0070050	GO:1900074
T1_32016	GO:0005875	GO:0016874
T1_32041	GO:0008652	GO:0016791
T1_32046	GO:0004872	GO:0016021	GO:0044424
T1_32047	GO:0000166	GO:0003939	GO:0006950	GO:0008270	GO:0055114
T1_32048	GO:0005769	GO:0006886	GO:0006911	GO:0030904	GO:0035091	GO:0035220	GO:0050821	GO:0061357	GO:0061359	GO:0090263
T1_32059	GO:0004197	GO:0006508
T1_32060	GO:0019842
T1_32063	GO:0004872	GO:0016021
T1_32065	GO:0005524	GO:0016616	GO:0046872	GO:0048037	GO:0055114
T1_3207	GO:0005102	GO:0007165
T1_32073	GO:0004485	GO:0005488	GO:0005759	GO:0006551
T1_32084	GO:0005576	GO:0007362	GO:0008293
T1_32101	GO:0000166	GO:0008152	GO:0030267	GO:0048037
T1_32111	GO:0004871	GO:0005525	GO:0007186	GO:0007498
T1_32128	GO:0031427
T1_32150	GO:0006508	GO:0008239	GO:0016805	GO:0046872
T1_32152	GO:0016020
T1_32163	GO:0005524	GO:0006950
T1_32168	GO:0008891
T1_32181	GO:0006012	GO:0008108	GO:0046872
T1_32199	GO:0009987	GO:0016020	GO:0048731	GO:0050896
T1_32207	GO:0000775	GO:0005730	GO:0008270	GO:0030496
T1_3221	GO:0000003	GO:0000398	GO:0002119	GO:0003729	GO:0003735	GO:0005730	GO:0005840	GO:0006412	GO:0007422	GO:0009792	GO:0010171	GO:0030532	GO:0040007	GO:0042254	GO:0071011
T1_32211	GO:0009653	GO:0009987	GO:0048731
T1_32221	GO:0000236	GO:0000785	GO:0000910	GO:0005524	GO:0005938	GO:0006508	GO:0007052	GO:0007423	GO:0008104	GO:0008233	GO:0016572	GO:0017111	GO:0032133	GO:0045448	GO:0051233
T1_3225	GO:0003735	GO:0005840	GO:0006412
T1_32265	GO:0005811	GO:0008453	GO:0009436
T1_32267	GO:0016787
T1_32272	GO:0001738	GO:0007155	GO:0007163	GO:0007560	GO:0007610	GO:0008283	GO:0030154	GO:0040011	GO:0042221	GO:0044459	GO:0050794	GO:0050877	GO:0051179	GO:0071842
T1_32273	GO:0016787
T1_32279	GO:0016021	GO:0022857	GO:0055085
T1_3228	GO:0016740
T1_32292	GO:0004579	GO:0005789	GO:0005811	GO:0007030	GO:0018279	GO:0022008	GO:0034389
T1_32306	GO:0016746
T1_32314	GO:0008168	GO:0032259
T1_32318	GO:0008152	GO:0016758
T1_32321	GO:0004777	GO:0005739	GO:0009450
T1_32328	GO:0016740
T1_32329	GO:0016757
T1_32330	GO:0004475
T1_32343	GO:0004017	GO:0004127	GO:0004849	GO:0005524	GO:0005737	GO:0009041	GO:0046034	GO:0046939
T1_32349	GO:0003677	GO:0003725	GO:0004386	GO:0004525	GO:0005524	GO:0005622	GO:0006396
T1_32354	GO:0016757
T1_32356	GO:0006911	GO:0016740
T1_32363	GO:0003924	GO:0005525	GO:0005634	GO:0005794	GO:0006471	GO:0007030	GO:0007264	GO:0007269	GO:0009792	GO:0016197	GO:0030334	GO:0033227	GO:0048488	GO:0060628	GO:0070861	GO:0090158
T1_32367	GO:0000287	GO:0008152	GO:0008949	GO:0030976
T1_32373	GO:0008431
T1_32381	GO:0005524	GO:0006950
T1_32389	GO:0004462	GO:0046872
T1_32392	GO:0005811
T1_32397	GO:0016020
T1_32405	GO:0005743	GO:0006839	GO:0008517	GO:0015884	GO:0016021	GO:0055085
T1_32409	GO:0016746
T1_32410	GO:0007155	GO:0016021
T1_32433	GO:0003824	GO:0005488
T1_32440	GO:0003993
T1_32449	GO:0004497	GO:0009055	GO:0016705	GO:0020037	GO:0055114
T1_32451	GO:0004497	GO:0009055	GO:0016705	GO:0020037	GO:0055114
T1_32459	GO:0016491	GO:0046331
T1_32460	GO:0004587	GO:0005759	GO:0006591	GO:0022008	GO:0030170
T1_32491	GO:0016491
T1_3250	GO:0000166	GO:0004176	GO:0016746	GO:0019538
T1_32510	GO:0003824	GO:0005975	GO:0043169
T1_32511	GO:0003824	GO:0005975	GO:0043169
T1_32514	GO:0003824
T1_32518	GO:0000166	GO:0008270	GO:0016491	GO:0055114
T1_32520	GO:0003824	GO:0008152
T1_32524	GO:0003779	GO:0005865	GO:0006939	GO:0035626	GO:0070594
T1_32526	GO:0005344	GO:0015671	GO:0019825	GO:0020037
T1_32541	GO:0005605	GO:0008406	GO:0016477	GO:0070831
T1_32553	GO:0004416	GO:0005875	GO:0008270
T1_32554	GO:0004416	GO:0005875
T1_32558	GO:0016787	GO:0046872
T1_3258	GO:0005524	GO:0005634	GO:0006298	GO:0030983
T1_32580	GO:0000122	GO:0003700	GO:0005634	GO:0032922	GO:0042752
T1_32581	GO:0004564	GO:0008152
T1_32584	GO:0004252	GO:0005576	GO:0006508	GO:0007311	GO:0008063	GO:0031638
T1_32587	GO:0005488
T1_3259	GO:0008152	GO:0016787
T1_32602	GO:0005524	GO:0005739	GO:0005811	GO:0005875	GO:0006457	GO:0009408	GO:0016887	GO:0032440	GO:0051082	GO:0055114
T1_32603	GO:0000059	GO:0004175	GO:0005643	GO:0005811	GO:0005875	GO:0005886	GO:0006607	GO:0007291	GO:0007301	GO:0007303	GO:0008283	GO:0008320	GO:0015629	GO:0042332	GO:0048542	GO:0051298
T1_32626	GO:0016614	GO:0046331
T1_32631	GO:0003824	GO:0044237	GO:0044238
T1_32632	GO:0016491
T1_32638	GO:0000166	GO:0016491	GO:0055114
T1_3264	GO:0004672
T1_32652	GO:0003677	GO:0003682	GO:0005524	GO:0005656	GO:0006267	GO:0006270	GO:0007067	GO:0007307	GO:0043138	GO:0046331	GO:0046872	GO:0051301
T1_32673	GO:0016614
T1_32690	GO:0016020	GO:0016740
T1_32694	GO:0003700	GO:0005634	GO:0005700	GO:0006338	GO:0007379	GO:0007480	GO:0008301	GO:0008348	GO:0017025	GO:0017055	GO:0043388	GO:0043565
T1_32695	GO:0000166	GO:0004757	GO:0004872	GO:0006729	GO:0007186	GO:0016021	GO:0055114
T1_32704	GO:0005488	GO:0016876
T1_32705	GO:0005886	GO:0007268	GO:0008306	GO:0090281
T1_32728	GO:0016787
T1_32743	GO:0004968	GO:0007186	GO:0016021	GO:0097211
T1_32752	GO:0022008
T1_3276	GO:0008233
T1_32797	GO:0008073	GO:0043086
T1_32807	GO:0000398	GO:0071011
T1_32820	GO:0042302
T1_32822	GO:0005789	GO:0016021	GO:0045169	GO:0046331
T1_32827	GO:0016787
T1_32828	GO:0005886	GO:0071456
T1_32829	GO:0004647	GO:0006564	GO:0016311
T1_32844	GO:0005524	GO:0006200	GO:0042626	GO:0043190
T1_32846	GO:0004364	GO:0005488	GO:0005737	GO:0006559	GO:0006572	GO:0016034
T1_32864	GO:0016787	GO:0044424
T1_32868	GO:0005576	GO:0042742	GO:0045087
T1_32871	GO:0004825	GO:0005524	GO:0005737	GO:0006431
T1_32876	GO:0005783	GO:0005794	GO:0016021	GO:0033619	GO:0042500
T1_32907	GO:0003916	GO:0005509	GO:0005634	GO:0005703	GO:0005737	GO:0006265	GO:0006325	GO:0009047	GO:0045893
T1_32913	GO:0016787
T1_32918	GO:0008152	GO:0016798
T1_32920	GO:0009055	GO:0016705	GO:0020037	GO:0055114
T1_32925	GO:0004739	GO:0006096	GO:0008406	GO:0009792	GO:0016477	GO:0040010	GO:0043231	GO:0048477	GO:0055114
T1_32932	GO:0016787
T1_32937	GO:0008146
T1_32941	GO:0005912
T1_32944	GO:0000070	GO:0006911	GO:0022008
T1_32957	GO:0003700	GO:0004000	GO:0005634	GO:0006355	GO:0043565
T1_32967	GO:0000287	GO:0004743	GO:0005811	GO:0005829	GO:0006096	GO:0016310	GO:0030955
T1_32968	GO:0005506	GO:0005740	GO:0044425	GO:0045333
T1_32973	GO:0016787
T1_32974	GO:0003988	GO:0005739	GO:0005811	GO:0005875	GO:0006635
T1_32978	GO:0003824
T1_3299	GO:0003990	GO:0004091	GO:0050253	GO:0080030	GO:0080031	GO:0080032
T1_32993	GO:0008237
T1_32994	GO:0016787
T1_33000	GO:0004872	GO:0005525	GO:0005622	GO:0007264	GO:0022008	GO:0035293
T1_33004	GO:0004776	GO:0005749	GO:0006099	GO:0008177	GO:0022900	GO:0050660
T1_33021	GO:0016311	GO:0016791
T1_33022	GO:0000166	GO:0003729	GO:0003743	GO:0005829	GO:0005852	GO:0006446
T1_33048	GO:0006810	GO:0016021
T1_33067	GO:0004345	GO:0006098	GO:0050661
T1_33070	GO:0005811	GO:0010883	GO:0010898	GO:0022008	GO:0032994	GO:0034389
T1_33071	GO:0003677	GO:0032542	GO:0055114
T1_33082	GO:0008270
T1_33083	GO:0044249
T1_33084	GO:0000902	GO:0003779	GO:0005200	GO:0005884	GO:0005885	GO:0008064
T1_33096	GO:0016772	GO:0044237	GO:0044238
T1_33099	GO:0008152	GO:0016491	GO:0046872
T1_331	GO:0005488
T1_3310	GO:0005488
T1_33107	GO:0004176	GO:0004252	GO:0005524	GO:0005759	GO:0006508	GO:0007005
T1_33116	GO:0005886	GO:0008152	GO:0016798	GO:0044425
T1_3312	GO:0016614	GO:0019288	GO:0020011	GO:0055114
T1_3314	GO:0004222	GO:0006508
T1_33145	GO:0003958	GO:0005506	GO:0005789	GO:0005811	GO:0010181	GO:0055114
T1_33156	GO:0003924	GO:0005525	GO:0006727	GO:0006856	GO:0007264	GO:0008057	GO:0008355	GO:0015031
T1_33158	GO:0005215
T1_33164	GO:0002218	GO:0005634	GO:0005737	GO:0007476	GO:0016998	GO:0050829
T1_33166	GO:0006952	GO:0016998	GO:0044424
T1_33185	GO:0004503	GO:0005576	GO:0006583	GO:0006952	GO:0046872	GO:0055114
T1_33189	GO:0003937	GO:0004643	GO:0006164	GO:0042060
T1_33201	GO:0000915	GO:0000916	GO:0001700	GO:0004129	GO:0005548	GO:0005751	GO:0005886	GO:0006810	GO:0007110	GO:0007111	GO:0007112	GO:0016006	GO:0022008	GO:0031566	GO:0031965	GO:0032154	GO:0035091	GO:0043147	GO:0048137	GO:0070732
T1_33204	GO:0004674	GO:0016310
T1_3322	GO:0005488	GO:0016887
T1_33220	GO:0009987	GO:0051179
T1_33225	GO:0005856	GO:0007010	GO:0032501	GO:0032989	GO:0044444	GO:0048468	GO:0048786	GO:0051640
T1_33229	GO:0016829	GO:0022008
T1_3323	GO:0005622
T1_33238	GO:0003860
T1_33240	GO:0019187
T1_33241	GO:0004820	GO:0005524	GO:0005737	GO:0006426
T1_33247	GO:0004553
T1_3325	GO:0003676
T1_33255	GO:0022891
T1_33260	GO:0016301	GO:0016773
T1_33268	GO:0022008
T1_33281	GO:0006662	GO:0006974	GO:0009055	GO:0015035	GO:0045454
T1_33293	GO:0000166	GO:0003960	GO:0008270	GO:0055114
T1_33296	GO:0008146
T1_33297	GO:0016740
T1_33298	GO:0008146	GO:0017051
T1_33302	GO:0003333	GO:0005765	GO:0015184	GO:0015811
T1_33306	GO:0004806	GO:0005811	GO:0006642	GO:0008340	GO:0010884	GO:0019433	GO:0055088
T1_33308	GO:0016787
T1_33310	GO:0009987
T1_33320	GO:0000165	GO:0000186	GO:0004709	GO:0005524
T1_33326	GO:0000398	GO:0005515	GO:0005634	GO:0005887	GO:0005938	GO:0006930	GO:0007010	GO:0007160	GO:0007220	GO:0007411	GO:0007417	GO:0007508	GO:0007517	GO:0007608	GO:0008340	GO:0008360	GO:0008593	GO:0016324	GO:0016337	GO:0030718	GO:0031252	GO:0035099	GO:0035160	GO:0035212	GO:0043066	GO:0046329	GO:0046331	GO:0048190	GO:0048803
T1_3333	GO:0016301	GO:0016773	GO:0046854	GO:0048015
T1_33336	GO:0003824	GO:0005975	GO:0043169
T1_33346	GO:0005576	GO:0005737	GO:0017040	GO:0031629	GO:0035187	GO:0045494	GO:0046514
T1_33349	GO:0003824
T1_3335	GO:0016021
T1_33353	GO:0008467
T1_33374	GO:0005886	GO:0006937	GO:0008104	GO:0032940	GO:0045202	GO:0045313	GO:0048488
T1_33385	GO:0005488
T1_3339	GO:0004013	GO:0006730
T1_33391	GO:0003824	GO:0044237	GO:0044238
T1_33397	GO:0005524	GO:0005615	GO:0005783	GO:0005811	GO:0005875	GO:0009408	GO:0016246	GO:0016887	GO:0030431	GO:0051298
T1_33399	GO:0005730	GO:0022008	GO:0042273
T1_334	GO:0005488
T1_3342	GO:0005488
T1_33428	GO:0005085	GO:0005769	GO:0005770	GO:0006897	GO:0007032	GO:0008333	GO:0016324	GO:0035091	GO:0044448	GO:0046872
T1_3343	GO:0003779
T1_33444	GO:0001700	GO:0002009	GO:0007442	GO:0048513	GO:0048598	GO:0050794	GO:0065008
T1_33450	GO:0007005
T1_33459	GO:0004222	GO:0005524	GO:0005739	GO:0005783	GO:0006508	GO:0008270	GO:0016021	GO:0016887	GO:0030163	GO:0046331
T1_33463	GO:0008453
T1_33465	GO:0004497	GO:0009055	GO:0016705	GO:0020037	GO:0055114
T1_33476	GO:0005789	GO:0019915
T1_33504	GO:0003676	GO:0005622	GO:0008270
T1_33509	GO:0005811	GO:0016787
T1_33510	GO:0005488
T1_33526	GO:0004370	GO:0005975	GO:0006072	GO:0016310
T1_33535	GO:0003997	GO:0008152
T1_33538	GO:0070011
T1_33552	GO:0003743	GO:0005852	GO:0006446
T1_33561	GO:0016740
T1_33569	GO:0000413	GO:0003755	GO:0005622	GO:0006457	GO:0008270
T1_33571	GO:0000413	GO:0003755	GO:0005622	GO:0006457	GO:0008270
T1_33573	GO:0004821	GO:0005524	GO:0005737	GO:0006427
T1_33578	GO:0000910	GO:0003924	GO:0004767	GO:0005525	GO:0005811	GO:0006911	GO:0007264	GO:0015031
T1_33585	GO:0005215
T1_33611	GO:0008233
T1_33627	GO:0008152	GO:0016791
T1_33629	GO:0016491
T1_33632	GO:0007281	GO:0012501	GO:0051179
T1_33638	GO:0004842	GO:0006508	GO:0016567
T1_33644	GO:0016758
T1_33656	GO:0003824
T1_33659	GO:0000287	GO:0004449	GO:0005759	GO:0005875	GO:0006099	GO:0051287
T1_33661	GO:0004802	GO:0005811	GO:0005875	GO:0031122	GO:0031935
T1_33664	GO:0016021
T1_33675	GO:0005509
T1_33688	GO:0004591	GO:0005875	GO:0006099	GO:0009353
T1_33689	GO:0004497	GO:0009055	GO:0016705	GO:0020037	GO:0055114
T1_33695	GO:0000166	GO:0006810	GO:0009987	GO:0016020	GO:0042626	GO:0044464
T1_33696	GO:0003779	GO:0005523	GO:0005856	GO:0007010	GO:0007476	GO:0045169
T1_33699	GO:0016491	GO:0046872
T1_33713	GO:0008233
T1_33737	GO:0016021
T1_3374	GO:0005515
T1_33762	GO:0000166	GO:0003677	GO:0005634	GO:0046332
T1_33769	GO:0016757
T1_3377	GO:0003841	GO:0008654	GO:0016020
T1_33778	GO:0000221	GO:0005524	GO:0005886	GO:0007446	GO:0008553	GO:0015991	GO:0046034	GO:0046933	GO:0046961	GO:0048388
T1_33782	GO:0003824
T1_33794	GO:0000257
T1_33798	GO:0004854	GO:0004855	GO:0005506	GO:0005777	GO:0005875	GO:0006144	GO:0006206	GO:0006525	GO:0006568	GO:0006650	GO:0008340	GO:0008762	GO:0009055	GO:0043546	GO:0048072	GO:0050660	GO:0051537	GO:0055114
T1_33803	GO:0006810	GO:0016020	GO:0022891	GO:0046427
T1_33806	GO:0005576	GO:0045088	GO:0051635
T1_33809	GO:0005488
T1_33810	GO:0005488	GO:0016491
T1_33812	GO:0004497	GO:0009055	GO:0016705	GO:0020037	GO:0055114
T1_33813	GO:0004497	GO:0009055	GO:0016705	GO:0020037	GO:0055114
T1_33816	GO:0006629	GO:0016787
T1_33833	GO:0000166	GO:0004674	GO:0006468
T1_33840	GO:0000790	GO:0003700	GO:0005515	GO:0005783	GO:0006355	GO:0007424	GO:0008270	GO:0008380	GO:0016021	GO:0016817	GO:0030532	GO:0033619	GO:0034620	GO:0042500
T1_33842	GO:0006810	GO:0007616
T1_33845	GO:0004591	GO:0005875	GO:0006099	GO:0009353	GO:0030976
T1_33881	GO:0009055	GO:0046872
T1_33886	GO:0008233
T1_33893	GO:0003779	GO:0005543	GO:0007165
T1_33902	GO:0002121	GO:0003779	GO:0005576	GO:0005829	GO:0005884	GO:0006911	GO:0007286	GO:0008594	GO:0016337	GO:0045214	GO:0048788	GO:0051643	GO:0051646	GO:0051647
T1_33903	GO:0008239
T1_33908	GO:0004355	GO:0005506	GO:0006537	GO:0006807	GO:0010181	GO:0016040	GO:0050660	GO:0051536	GO:0055114
T1_33909	GO:0004355	GO:0005506	GO:0006537	GO:0006807	GO:0007155	GO:0010181	GO:0016040	GO:0017113	GO:0050660	GO:0051536	GO:0055114
T1_33916	GO:0004067	GO:0008418
T1_33925	GO:0003924	GO:0004767	GO:0005515	GO:0005525	GO:0005634	GO:0005737	GO:0005886	GO:0005912	GO:0006911	GO:0007179	GO:0007254	GO:0007264	GO:0007274	GO:0007286	GO:0007349	GO:0007396	GO:0008045	GO:0008360	GO:0008582	GO:0016028	GO:0030011	GO:0030031	GO:0030424	GO:0030426	GO:0030833	GO:0030866	GO:0035011	GO:0035099	GO:0035318	GO:0042060	GO:0045185	GO:0045200	GO:0045860	GO:0046664	GO:0046843	GO:0048813	GO:0050770	GO:0060446
T1_33939	GO:0008233
T1_33947	GO:0003677	GO:0003872	GO:0005524	GO:0005634	GO:0005700	GO:0005945	GO:0006096	GO:0006338	GO:0016310	GO:0022008
T1_33948	GO:0004692	GO:0005524	GO:0005886	GO:0006468	GO:0007614	GO:0007616	GO:0008016	GO:0008345	GO:0009744	GO:0030536	GO:0032095	GO:0046959
T1_33958	GO:0006810	GO:0016020
T1_3396	GO:0003723
T1_33962	GO:0016491
T1_33967	GO:0008152	GO:0016798
T1_33969	GO:0006264	GO:0006390	GO:0032543
T1_33995	GO:0000287	GO:0004614	GO:0004619	GO:0005978	GO:0046331	GO:0060361
T1_34003	GO:0000381	GO:0003729	GO:0007052	GO:0022008	GO:0030532	GO:0048025	GO:0071011	GO:0071013
T1_34006	GO:0008092	GO:0009987	GO:0071944
T1_34027	GO:0008378
T1_34031	GO:0008376	GO:0009247
T1_34034	GO:0003824
T1_34037	GO:0004497	GO:0009055	GO:0016705	GO:0020037	GO:0055114
T1_34038	GO:0004497	GO:0009055	GO:0016705	GO:0020037	GO:0055114
T1_34043	GO:0003997	GO:0006911	GO:0008152
T1_34051	GO:0009058	GO:0016740
T1_34054	GO:0003876	GO:0005515	GO:0006188
T1_34066	GO:0005506	GO:0016491
T1_34089	GO:0031326	GO:0043231	GO:0080090
T1_34093	GO:0003774	GO:0003779	GO:0005524	GO:0005902	GO:0007015	GO:0007605	GO:0008407	GO:0008586	GO:0016461	GO:0030048	GO:0030898	GO:0032027	GO:0035293	GO:0035317	GO:0045179	GO:0048800
T1_34095	GO:0003774	GO:0003779	GO:0005524	GO:0005902	GO:0007015	GO:0007605	GO:0008407	GO:0008586	GO:0016461	GO:0030048	GO:0030898	GO:0032027	GO:0035293	GO:0035317	GO:0045179	GO:0048800
T1_34120	GO:0003873	GO:0004331	GO:0005524	GO:0006000	GO:0006003	GO:0007476	GO:0016310
T1_34123	GO:0005576	GO:0005737	GO:0017040	GO:0031629	GO:0035187	GO:0045494	GO:0046514
T1_34128	GO:0004723	GO:0005509	GO:0005516	GO:0005955	GO:0006470	GO:0007126	GO:0007269	GO:0008021	GO:0008597	GO:0016192	GO:0030241	GO:0030431	GO:0045214	GO:0051533
T1_34134	GO:0005615	GO:0005886	GO:0005975	GO:0016231	GO:0032504	GO:0043169	GO:0044130
T1_34136	GO:0006886	GO:0035091	GO:0060070	GO:0061357
T1_34138	GO:0005215
T1_3414	GO:0004105	GO:0006657
T1_34142	GO:0003824	GO:0009062	GO:0019433	GO:0046627	GO:0071616
T1_34144	GO:0009062	GO:0016874	GO:0019433	GO:0046627	GO:0071616
T1_34150	GO:0005747	GO:0006120	GO:0008137	GO:0010181	GO:0051287	GO:0051539
T1_34151	GO:0003824	GO:0044237	GO:0044238
T1_34155	GO:0006726
T1_34161	GO:0007498	GO:0035317	GO:0045886
T1_34172	GO:0005856
T1_34174	GO:0005537
T1_34176	GO:0004473	GO:0005739	GO:0006090	GO:0006108	GO:0016619	GO:0046872	GO:0051287	GO:0055114
T1_34178	GO:0004222	GO:0006508	GO:0007229
T1_34190	GO:0004069	GO:0006520	GO:0009058	GO:0030170	GO:0080130
T1_34194	GO:0007283	GO:0016021
T1_34201	GO:0003824
T1_34212	GO:0004775	GO:0005524	GO:0005813	GO:0005875	GO:0006099	GO:0007052	GO:0009361	GO:0010824	GO:0046872
T1_34221	GO:0000103	GO:0004020	GO:0004781	GO:0005524	GO:0007476	GO:0016310
T1_34223	GO:0008429
T1_34224	GO:0004930	GO:0005886	GO:0007218	GO:0016021
T1_34225	GO:0004930	GO:0007186	GO:0016020
T1_34254	GO:0005515	GO:0005856	GO:0007010	GO:0007017	GO:0007409	GO:0007424	GO:0048513	GO:0050794
T1_34260	GO:0005634	GO:0005737	GO:0006974	GO:0032869	GO:0045944	GO:0071456
T1_34272	GO:0004872	GO:0005102	GO:0006930	GO:0007157	GO:0007160	GO:0007229	GO:0007391	GO:0007411	GO:0007417	GO:0007426	GO:0007427	GO:0007494	GO:0007508	GO:0007608	GO:0008305	GO:0008340	GO:0008360	GO:0016203	GO:0016339	GO:0030718	GO:0031252	GO:0035099	GO:0035160	GO:0048803	GO:0050839
[truncated: 13,587 more rows]
[truncated: 56 more columns]
